# Supplementary material
Source: PubMed Central journal article supplement (PMC5563076)
Supplement: NIHMS867745-supplement-SuppMat.pdf [file NIHMS867745-supplement-SuppMat.pdf]

1 A global map of genetic diversity in *Babesia microti* reveals strong population structure  
2 and identifies variants associated with clinical relapse  
3  
4  
5  
6  
7  
8 Supporting information  
9

10 **Supplemental Text:**

11

12 **Sequencing and Enrichment of Global and US *Babesia microti*:**

13

14 Zoonotic *B. microti* in the US was first described on Nantucket in 1969<sup>1</sup> and later  
15 recognized at multiple sites throughout the Northeast and Midwest during the 1980s<sup>2,3</sup>.  
16 Phylogenetic analysis of 18S RNA and beta-tubulin genes has established a species  
17 complex with at least three major clades, with the original Nantucket strains along with  
18 strains from Switzerland and Russia labeled as Clade 1 or *B. microti* sensu stricto<sup>4</sup>, and  
19 *B. microti*-like strains such as those from Japan<sup>5,6</sup>, Alaska, and Europe classified as  
20 Clades 2 and 3, or *B. microti* sensu lato<sup>4</sup>, though others have proposed that *B. microti* be  
21 reclassified as a genus<sup>7</sup>. We studied samples from Japan<sup>5,6</sup>, Alaska<sup>8</sup>, Russia<sup>9</sup>, and  
22 multiple sites in the United States. The origin, date of collection, and sample identifiers  
23 for each sample are listed in Supplemental Table 1. The identifiers used to refer to  
24 geographic groupings of samples are given below in the section “Nomenclature and  
25 Geographic Groupings”.

26 For clinical, rodent, and tick samples, we developed three methods to enrich for  
27 parasite material for sequencing: Leukocyte depletion based on cellulose filtration<sup>10</sup>,  
28 which produced 4.9 (+/- 5.4) -fold enrichment (Supplementary Fig. 1), and two methods  
29 of hybrid selection<sup>11</sup> (Supplementary Fig. 1), which yielded an 85.9 (+/- 78.6)-fold  
30 enrichment, sufficient to sequence the low quantities of parasite DNA from ticks.

31 Reads from *B. microti* sensu lato samples aligned poorly to the *B. microti* R1  
32 reference genome<sup>12</sup> and were assembled de novo (see methods), producing draft  
33 assemblies of 5.87 Mb for AW-1<sup>5</sup> (Japan), 5.87 Mb for Hobetsu<sup>5</sup> (Japan), and 6.14 Mb  
34 for CR400<sup>8</sup> (Alaska), which are included as supplemental files. *B. microti*-like genomes  
35 displayed substantial nucleotide divergence, with a mean nucleotide diversity of 84.4%  
36 for the Alaskan strain and 85.5% for the Japanese strain as compared to the R1  
37 reference (Supplemental Fig 12a-c). Despite this, the assembled contigs from Alaskan  
38 and Japanese strains possessed a conserved genomic architecture (Supplemental Fig.  
39 5a-c) and aligned in contiguous blocks with *B. microti* R1 reference. The distribution of  
40 contig sizes for the draft assemblies is given in Supplemental Figure 12c-f.

41 **Nomenclature and Geographic Groupings:**

42 In order to refer to groups of strains consistently, we used the following naming  
43 conventions:

44 Nantucket (NAN): Samples from Nantucket (includes Bab14, which groups with  
45 Nantucket samples).

46 Mainland New England (MNE): Samples from Connecticut, Rhode Island,  
47 Massachusetts, New Hampshire, and Maine. Excludes samples from NAN lineage  
48 above. This includes ND11, which was isolated from a North Dakota resident, but types  
49 with other MNE samples.

50 Coastal New England (CNE): Samples from Mainland New England and Nantucket, i.e.  
51 the union of NAN and MNE.

52 Reference group (REF): This includes the R1 reference<sup>12</sup> and samples that group with it.

53 Northeast (NE): All samples from the Northeastern United States, i.e. the union of NAN,  
54 MNE, and REF.

55 Midwest (MW): Samples from Minnesota and Wisconsin. This group excludes ND11, as  
56 above, which groups with MNE samples.

57 Continental US (CUS): All samples from the Northeast and Midwest, i.e. the union of  
58 MW and NE.

59 Global: All study samples, including those from Alaska, Japan, Russia, and the  
60 Continental United States (CUS).

61 *B. microti* sensu stricto (BMSS): All Clade 1 samples, i.e. the union of CUS and the  
62 sample from Russia.

### 63 **Within-Host Evolution and Differences between Zoonotic and Enzootic Strains:**

64 Among the 35 distinct BMSS strains studied (excluding the 3 serial samples of GI and 1  
65 serial sample of RMNS), 32 were obtained from clinical cases of human babesiosis (plus  
66 the reference R1). We sequenced two samples from tick (PI-2000, SN-1988), which fell  
67 into the MNE and REF group lineages, respectively. One BMSS strain (MYS/Russia)  
68 was from a vole (*Clethrionomys glareolus*). Both PI-2000 and SN-1988 were  
69 phylogenetically situated within major lineages and were indistinguishable by nucleotide  
70 or structural differences from zoonotic samples, although the study was not powered to  
71 detect differences between zoonotic and enzootic samples. The three lineages that have  
72 been detected in the Northeast by VNTR typing<sup>13</sup> were identified in ticks, and we see the  
73 same lineages in clinical cases. Thus, it appears that all major enzootic lineages are  
74 capable of producing human disease, though whether certain lineages are more likely to  
75 do so remains is not yet known.

76 We sequenced serial samples of Bab16 over a course of 5 days. We did not observe  
77 any mutations. Together with the observation that only three mutations accumulated in  
78 GI and RMNS strains sampled over a period of 32 years of laboratory propagation, it  
79 appears rates of within-host evolution are slow, and this is consistent with inferred rates  
80 of mutation (Supplemental Figure 6D).

### 81 **Time to Most Recent Common Ancestry:**

82

83 Root-to-tip analysis of the Mainland New England and Nantucket lineages, for which  
84 samples were available over the time period 1969 – 2015, supported the existence of a  
85 molecular clock (Supplemental Figure 6a-b).

86 We used dates of collection at tip-dates to infer a rate of the molecular clock and to  
87 estimate the time of most recent common ancestry for the identified lineages. The  
88 sequence of Gray<sup>1</sup> (1969) and Peabody<sup>14</sup> (1973) strains was identical, which we attribute  
89 to either an extreme lack of genetic diversity during the 1960s and 1970s on Nantucket  
90 or to contamination of ATCC stocks at some point in the preservation or procurement  
91 process. Thus, for the purposes of BEAST analysis, only one of these genomes was  
92 considered and this was assigned a collection date of 1971 with an uncertainty of +/- 2  
93 years. Chromosome 2 sequences were excluded from the analysis based on the  
94 uncertain ancestry of select regions of chromosome 2 (see below). The precise  
95 collection time of the R1 reference isolate<sup>12</sup> was not known and this was assigned a  
96 collection date of 2005 +/- 5 years. Following Drummond et al.<sup>15</sup>, we compared strict  
97 molecular clock (CLOC) models, uncorrelated exponential (UCED) and log-normal  
98 (UCLN) relaxed clock models. We used an HKY84 model for nucleotide substitution with  
99 gamma-distributed rates with 4 site categories. We used the complete genomes  
100 including both coding and non-coding sequences since most *B. microti* DNA is coding,  
101 genes are densely spaced, and the assumption that the small intergenic regions are  
102 neutral is doubtful. We also fit codon-partitioned models on the concatenated coding  
103 sequence for all coding genes. We used an infinite uniform (improper) prior over the  
104 interval  $[-\infty, \infty]$  for CLOC\_IU model and a Gamma(4,  $5 \times 10^{-9}$ ) prior based on empirical  
105 substitution data for CLOC\_G, UCED\_G, and UCLN\_G models. The choice of prior was  
106 based on observed mutation data for laboratory-propagated strains. The GI strain, which  
107 was continuously maintained for 28 years with tick and rodent passage, accumulated 2  
108 SNPs over this interval. The RMNS strain, maintained similarly for 4 years, accumulated  
109 1 SNP over this interval. If we model mutations as a Poisson process,  $P(n) = (\lambda T)^n e^{-\lambda T} / n!$ ,  
110 for an observed  $n = 3$  events observed over an interval of  $T = 32 \text{ years} \times 6395000$   
111 sites, the maximum likelihood estimate for  $\lambda$  is  $n/T = 1.47 \times 10^{-8}$  variants/site/year. The  
112 shape of this likelihood is closely approximated by a Gamma(4,  $5 \times 10^{-9}$ ) (Supplemental  
113 Figure 6C). We therefore chose Gamma(4,  $5 \times 10^{-9}$ ) as a prior, justified by observed rates  
114 of evolution in laboratory lines and encompassing a range of plausible rates from  $5.5 \times 10^{-9}$   
115 to  $4.5 \times 10^{-8}$  (95%HPD). This prior closely matched the inferred substitution rate for MNE  
116 and NAN lineages (Supplemental Figure 6D) obtained using an uninformative (improper  
117 uniform) prior in both lineages independently.

118 The four models produced similar estimates for TMRCA (Figure 3B, Supplemental  
119 Figure 6, Supplemental Table 6). Importantly, estimates for CLOC\_IU and CLOC\_G45  
120 were very similar, suggesting that the gamma(4,  $5 \times 10^{-9}$ ) is appropriate for these data and  
121 not resulting in aberrant or unreliable estimates. Generally, relaxed clock models were  
122 favored by model comparison using the harmonic mean estimator<sup>16</sup> and Akaike  
123 Information Criteria through MCMC<sup>17</sup> (Supplemental Table 6A-B). However, strict clock  
124 models may be more biologically appropriate as CUS samples are closely related  
125 members of a single species. We present models of both types. All models estimated  
126 TMRCA for NAN, REF, and MNE at between 40-600 years. TMRCA between NE and  
127 MW was earlier, between 300 – 5,000 years. Estimates for TMRCA placed divergence of  
128 CUS samples within the last 15,000 years. We estimated a median mutation rate of



129  $1.92 \times 10^{-8}$  / site / year [median; 95% HPD  $3.84 \times 10^{-9}$  –  $3.53 \times 10^{-8}$ ] under the CLOC\_IU  
130 model (Supplemental Figure 4) and of  $1.85 \times 10^{-8}$  / site / year [median; 95% HPD  $8.01 \times 10^{-9}$   
131 –  $3.00 \times 10^{-8}$ ] under the CLOC\_G model. This was consistent among sublineages (MNE  
132 –  $2.2 \times 10^{-8}$  / site / generation [95% HPD  $4.40 \times 10^{-10}$  –  $4.7 \times 10^{-8}$ ] and NAN -  $2.2 \times 10^{-8}$  / site  
133 / generation [95%HPD  $2.89 \times 10^{-9}$  –  $4.35 \times 10^{-8}$ ]) analyzed independently under CLOC\_IU  
134 models. This held for trees computed on NAN samples alone, MNE samples alone  
135 (lineages for which adequate numbers of reliably dated longitudinal samples were  
136 collected), and for the set of CUS samples (Supplemental Figure 6). Median and 95%  
137 HPD estimates for TMRCA are shown in Figures 3c-d. We also used a codon-partitioned  
138 model for aligned coding sequences, which produced similar results (Supplemental  
139 Figure 6G), with the exception of CLOC\_IU models, which had slightly wider HPD  
140 intervals. We estimated divergence between CUS and Russian *B. microti*, but these  
141 estimates were less precise. Most models placed this divergence between 200,000 and  
142 1.5 million years ago. The CLOC yielded a slightly higher upper bound (up to 2.6 million  
143 years ago). In cases where the CLOC\_IU models produced wider HPD intervals, this is  
144 attributable to the model's allowance of mutation rates approaching zero, which are  
145 biologically implausible, and it is likely that inference under models with informative  
146 priors is more accurate. Overall, the estimates obtained from all models indicate 1) deep  
147 divergence between NE and MW lineages with subsequent radiation into sub-lineages  
148 (NAN, REF, MNE) along geographic lines 2) timing of the divergence among CUS  
149 samples consistent with proposed models of population isolation at the conclusion of the  
150 most recent ice age approximately 15,000 years ago<sup>18</sup> and 3) separation from Eurasian  
151 populations much earlier, hundreds of thousands to millions of years ago.

152 One potential weakness of these estimates is that they rest on a relatively simple  
153 demographic and mutational model and do not explicitly model changes in population  
154 size, geographic range, and recombination. As additional samples become available,  
155 these estimates may be refined. The absence of recombination in these models is not  
156 likely to have affected estimates for EC lineages, which do not show strong evidence of  
157 recombination (Supplemental Figure 5), particularly as chromosome 2 was excluded  
158 from BEAST analysis because of the unusually large proportion of alleles shared with  
159 MW samples (see below), but MW samples and estimates for CUS may be affected.  
160 Recombination would have a substantial effect on the TMRCA estimates if populations  
161 of different ages were interbreeding. However, had this happened, blocks of the genome  
162 within a given lineage would have a different mutational density than others, and we did  
163 not see evidence of such differences (Supplemental Figure 4E). Despite these  
164 limitations, the clear convergence to similar rates of evolution in independent lineages  
165 (Supplemental figure 6D), the concordance with the empirical molecular clock  
166 (Supplemental figures 6C-D) and consistency with proposed biogeographic models<sup>18</sup>, all  
167 argue in favor of the utility of our approach and support the estimates of most recent  
168 common ancestry among *B. microti* lineages.

#### 169 **Discordant loci on chromosome 2**

170 Two segments of chromosome 2, covering roughly positions 0 – 122 KB and 522 – 1000  
171 KB, respectively, display unusual levels of genetic divergence between the MNE and

172 Nantucket samples. This is reproducible between samples collected at different times,  
173 sequenced in different batches, and at different sites, and cannot be attributed to an  
174 artifact of sequencing or variant calling. These regions, which amount to ~10% of the  
175 nuclear genome, contain the majority of fixed differences between the samples (61 out  
176 of 82);  $\pi$  measured between the two populations within the segments is  $1.1 \times 10^{-4}$ , but  
177  $8.8 \times 10^{-6}$  in the remainder of the genome.

178

179 The same regions show much more allele sharing between the Midwest and either the  
180 MNE or the Nantucket samples than elsewhere in the genome. Table S2 breaks down  
181 the distribution of loci for which two of these populations share an allele and the third has  
182 a different allele. In the genome as a whole, more than 98% of the time the different  
183 allele occurs in the Midwest. In the chromosome 2 regions, however, the different allele  
184 is far more likely to occur in one of the eastern populations, with similar levels appearing  
185 in Nantucket and MNE. The reason for this signature is not entirely clear. It is possible  
186 that these regions represent introgression, i.e. acquisition of ancestral sequence to  
187 promote survival or fitness, but the presence of two distinct regions argues against a  
188 single event. Further analysis of this region as additional samples become available may  
189 shed light on the unusual pattern of variation seen on this chromosome.

190

#### 191 **Analysis of Recombination:**

192 Electron micrograph data have suggested that *Babesia microti* undergoes sexual  
193 development<sup>19</sup>; however, nuclear fusion has not been observed, nor have recombinant  
194 organisms been demonstrated. We applied the pairwise homoplasmy index<sup>20</sup> (PHI) to  
195 search for recombination in our samples. This revealed strong evidence of  
196 recombination in CUS samples and also BMSS. There was no evidence of  
197 recombination in the MNE or NAN lineages, and only on chromosome 4 in NE samples  
198 (Figure S5A). We attempted to localize signals of recombination by applying the PHI test  
199 within 100Kb windows of each chromosome. This analysis revealed a single localizable  
200 signal within the BMSS group, on chromosome 4, and equivocal signals on  
201 chromosomes 1 and 3. No other statistically significant regions were identified. Thus, we  
202 find evidence of recombination in *B. microti*, as evidence by an excess of incompatible  
203 sites<sup>20</sup>, but this does not appear to have strongly shaped variation within recently  
204 diverged lineages.

#### 205 **Multi-copy gene families and genomic distribution of variants:**

206 *B. microti* possesses a unique multi-copy gene family, BMN<sup>12,21</sup>. These genes occur at  
207 chromosome ends in subtelomeric regions as well as internal clusters and resemble  
208 multi-copy gene families of other bacteria and parasites. Multi-copy gene families are  
209 common among pathogens<sup>22</sup>, particularly eukaryotic parasites<sup>23-26</sup>. Within the  
210 Apicomplexa, such multi-copy gene families are found in *Plasmodia*, *Babesia*,  
211 *Cryptosporidia*, and *Eimeria*, and have recently been reviewed in depth by Reid<sup>27</sup>.  
212 Members of these gene families are often rapidly evolving through accelerated mutation,  
213 recombination, and gene conversion. For example, *P. falciparum* var genes, encoding

214 the PfEMP-1 proteins, mediate antigenic variation through a mutually exclusive  
215 expression mechanism<sup>28</sup>. Within *Babesia*, Variant Erythrocyte Surface Antigen (VESA)  
216 genes in *B. bovis*<sup>29-31</sup>, function in a manner similar to *var* genes in *P. falciparum*<sup>31</sup>.

217 The function of BMN genes in *B. microti* is not known, but they are postulated to  
218 contribute to chronic infection or immune evasion through differential expression or  
219 recombination<sup>21</sup>, though their degenerate repeat structure has raised speculation that  
220 their primary function is structural<sup>21</sup>. Among CUS samples, we did not observe an  
221 increased substitution rate among BMN gene families ( $P = 0.7$ , Wilcoxon Rank-Sum  
222 test), but diversity was extremely limited among these samples, which limits the power of  
223 this comparison. Comparing Russian *B. microti* to the R1 reference, we found evidence  
224 of an accelerated substitution rate in BMN genes (nucleotide diversity was a mean of 1.9  
225 fold greater than other coding sequences;  $P = 9.8 \times 10^{-3}$ , Wilcoxon Rank-Sum test, two-  
226 tailed alternative, Supplemental Figure 8F). BMN genes also had elevated dN/dS ratios  
227 when compared to the genome as a whole (Supplemental Figure 8E;  $P = 1.26 \times 10^{-5}$ ,  
228 Wilcoxon Rank-Sum test, two-tailed alternative). BMN genes in which zero variants were  
229 called were excluded from this analysis due to the likelihood that the reference sequence  
230 was too divergent to align reads. Not all members of the BMN family were under the  
231 same selective pressure, with BBM\_I0004 and BBM\_I03513 showing the strongest  
232 evidence of increased substitution and positive selection. BBM\_II01570 appeared to  
233 show weak evidence of negative selection, although manual inspection of this locus  
234 revealed a drop in coverage and a small number of called variants, suggesting that  
235 sequence may have diverged so substantially in this region that variants cannot be  
236 called with short reads. Supporting this, in the analysis of unfiltered variants  
237 (Supplemental Figure 7 and Supplemental Table 3), highly substituted regions contained  
238 multiple members of the BMN family. In general, resequencing approaches using short  
239 reads likely underestimate the true diversity in the BMN family, much of which may be  
240 generated by recombination or gene conversion<sup>32-34</sup>.

241 This issue likely affected other multi-copy gene families as well. *B. microti*  
242 contains three *vesa*-like genes and four *Theileria parva tpr*-like genes in mosaic  
243 subtelomeric structures<sup>12</sup>. The three VESA-like genes and one TPR-like protein  
244 (BBM\_III04845) were so highly polymorphic that we were unable to identify any variants.  
245 Three additional TPR-like proteins (BBM\_II04270, BBM\_III00015, and BBM\_I00005) had  
246 limited diversity; inspection of the aligned sequence found only small islands of short  
247 reads aligning with confidence allowing for variant detection, although those that aligned  
248 for BBM\_I0005 did show an excess of non-synonymous variants, providing weak  
249 evidence of positive selection (adjusted  $P = 0.22$ ). Furthermore, both BBM\_II04270 and  
250 BBM\_III00015 were found in highly substituted regions as identified by the analysis of  
251 unfiltered variants (Supplemental Table 3). Thus, given their multi-copy nature, presence  
252 at chromosome ends, and our inability to align short reads reliably to these sequences,  
253 we suspect that members of both families are also hyper-variable, perhaps more so than  
254 BMN.

255 **Clinical details of Relapsing Cases:**

256 **Bab05:** The patient from whom Bab05 was isolated was a 48 year-old woman with a  
257 severe case of babesiosis (16% parasitemia on first admission). Her past medical history  
258 was notable for cystic fibrosis status post double lung transplantation, idiopathic  
259 thrombocytopenic purpura status post splenectomy, and diabetes. Her home  
260 medications included trimethoprim/sulfamethoxazole (TMP/SMX), mycophenolate 750  
261 mg po three times daily, prednisone 15 mg po daily, and tacrolimus 4mg po twice daily.  
262 She presented with abdominal pain in July 2014 and was found to have babesiosis due  
263 to *B. microti* infection (initial parasitemia at with 16%). She was initiated on atovaquone  
264 750 mg po twice daily and azithromycin 500 mg po daily; her TMP/SMX was stopped at  
265 that time. Testing for Lyme antibodies (IgG and IgM) was negative, and PCR assays to  
266 *Anaplasma phagocytophilum*, and *Ehrlichia spp.* (*E. Chaffeensis*, *E. Ewingii*, *E. muris-*  
267 *like*) were all negative.

268 She underwent RBC exchange transfusion on hospital day (HD) 2. Her  
269 parasitemia sharply declined, clinical status improved, and she was discharged on HD9  
270 on atovaquone and azithromycin with a plan to continue on these medications for two  
271 weeks until her parasitemia cleared or at least 6 weeks. Clearance of microscopic  
272 parasitemia was documented 91 days after initial presentation. She continued on this  
273 regimen for 110 days after her initial presentation, at which time atovaquone was  
274 interrupted and the dose of azithromycin reduced to 250 mg po daily, for the purposes of  
275 parasite suppression and *Mycobacterium avium* complex (MAC) prophylaxis. 21 days  
276 later, she was readmitted with fevers and malaise. Parasitemia was at 21.7%, at which  
277 point a sample study was collected. She was initiated on an antibiotic regimen of  
278 clindamycin 600 mg po every 6hrs, atovaquone 750 mg po twice daily, and azithromycin  
279 500 mg po daily. She underwent exchange transfusion on day 129 and day 135, and her  
280 parasitemia decreased, with clinical improvement. Her parasitemia became undetectable  
281 by PCR on day 255, at which point clindamycin was discontinued (after a total of 124  
282 days), and the dose of azithromycin was reduced to 250 mg po daily, and atovaquone  
283 was changed to 1500mg po daily.

284 **Bab 14:** Bab14 was isolated from a 77 year-old man with a past medical history notable  
285 diffuse large B cell lymphoma and IgG4-related disease for which he had been treated  
286 with rituximab in April 2015. He was found to have babesiosis in August 2015 and  
287 treated with a 10-day course of atovaquone and azithromycin. He returned to care in  
288 November 2015 complaining of severe fatigue, at which time his Babesia PCR was  
289 noted to be positive (record of quantitative parasitemia not available) and he was  
290 restarted on atovaquone and azithromycin after transfusion of four units of packed red  
291 blood cells. Six days after re-initiation of treatment with atovaquone/azithromycin, his  
292 parasitemia was noted to 4.5% and his hematocrit 21. He received two additional units  
293 of packed red blood cells and was started on clindamycin/quinine. His parasitemia was  
294 3.8% two days after starting clindamycin/quinine and then 1% five days after starting, at  
295 which time a study sample was obtained. He experienced ototoxicity while on quinine  
296 was transitioned to atovaquone/azithromycin after five days of clindamycin/quinine. After  
297 restarting atovaquone/azithromycin, his parasitemia decreased to 0.5% after two days  
298 and then was less than 0.1% after 25 days and was microscopically undetectable 38

299 days later; his treatment was discontinued 40 days after transitioning back to  
300 atovaquone/azithromycin. Two months after discontinuing treatment he returned to care  
301 and was again found to have a positive Babesia PCR (no report of parasitemia  
302 available), at which time was restarted on atovaquone/azithromycin with a plan for  
303 ongoing monitoring by PCR and blood smear.

304  
305 **MGH2001** has been reported previously<sup>35</sup>. **BWH2003** and **MORNS2015** were noted by  
306 clinical providers to be relapsing cases and propagated in Hamsters to establish  
307 laboratory isolates. As a result of the protocol under which they were obtained, additional  
308 details of human infection beyond their relapsing status were unavailable.

#### 309 **Possible evidence for locally imported babesiosis in Bab14:**

310  
311 Bab14 was isolated from a resident of South Dennis, MA. The Bab14 parasite is  
312 separated from the Gray<sup>1</sup>/Peabody<sup>36</sup> strains, isolated on Nantucket in 1969 and 1973  
313 respectively. The patient had not travelled to Nantucket in over 10 years. While he had  
314 received blood transfusions as a part of his treatment for relapsed babesiosis, his  
315 diagnosis of babesiosis preceded transfusion. The presence of a Nantucket group  
316 parasite in this patient suggests the possibility that Nantucket group parasites have  
317 recently established a focus on mainland MA, or conversely that Nantucket group  
318 parasites are dispersed over a region that includes portions of mainland MA, and that  
319 the Gray/Peabody parasites were themselves imported to Nantucket some time after  
320 their divergence from other Nantucket-group parasites (i.e. RMNS, GI, BWH-2014),  
321 which differ from the Gray/Peabody/Bab14 group by 50 – 70 SNPs.

322

#### 323 **Copy Number Amplification containing *B. microti* MRP:**

324

325 In the Bab05 case, we also noted a three-fold amplification of a 15KB region on  
326 chromosome 2 (658,075-672,981); this region includes the gene BBM\_II01855  
327 (Supplemental Figure 13), which encodes an ABC transporter with homology to  
328 multidrug resistance-associated proteins (MRPs). Copy number variation is an  
329 established mechanism of drug resistance in *P. falciparum*, most notably the ABC  
330 transporter MDR1<sup>37,38</sup>. The *P. falciparum* homolog of MRP is known to influence quinine  
331 and chloroquine susceptibility in *P. falciparum*<sup>39</sup>. Given the uniqueness of this event in a  
332 case of severe relapse, we hypothesize that copy number variants in bmMRP may  
333 contribute to *B. microti* survival during atovaquone or azithromycin treatment.

334

335

## Supplementary Table 1:

| Sample Name | Source  | Site      | Origin                 | Year    | Enrichment Method | Coverage         | VNTR Type |
|-------------|---------|-----------|------------------------|---------|-------------------|------------------|-----------|
| Bab01       | Patient | MGH       | Natick, MA             | 2014    | Cellulose         | 16.0 (114.0)     | CT/RI     |
| Bab02       | Patient | MGH       | Millis, MA             | 2014    | Cellulose         | 60.6 (92.6)      | CT/RI     |
| Bab03       | Patient | MGH       | Topsfield, MA          | 2014    | Cellulose         | 27.2 (38.6)      | CT/RI     |
| Bab04       | Patient | MGH       | Bedford, MA            | 2014    | Cellulose         | 8.9 (14.5)       | CT/RI     |
| Bab05       | Patient | MGH       | Lyndeborough, NH       | 2014    | Cellulose         | 597.2 (882.7)    | CT/RI     |
| Bab06       | Patient | BWH       | N/A                    | 2015    | None              | 44.0 (65.3)      | N/A       |
| Bab07       | Patient | Faulkner  | N/A                    | 2015    | Cellulose         | 23.0 (35.8)      | N/A       |
| Bab08       | Patient | BWH       | N/A                    | 2015    | None              | 87.8 (447.1)     | N/A       |
| Bab10       | Patient | BWH       | Stonington, CT         | 2015    | Cellulose         | 209.1 (277.7)    | N/A       |
| Bab11       | Patient | MGH       | Norwell, MA            | 2015    | None              | 107.4 (153.8)    | N/A       |
| Bab12       | Patient | BWH       | N/A                    | 2015    | Cellulose         | 45.8 (71.8)      | N/A       |
| Bab13       | Patient | MGH       | Kennebunk, ME          | 2015    | None              | 28.7 (46.6)      | N/A       |
| Bab14       | Patient | MGH       | South Dennis, MA       | 2015    | None              | 12.9 (23.1)      | N/A       |
| Bab15       | Patient | MGH       | Winchester, MA         | 2015    | None              | 96.6 (140.6)     | N/A       |
| Bab16       | Patient | MGH       | Gloucester, MA         | 2015    | None              | 79.9 (105.5)     | N/A       |
| UMMS1       | Patient | UMMS      | N/A                    | 2014    | None              | 187.2 (212.5)    | N/A       |
| UMMS2       | Patient | UMMS      | N/A                    | 2014    | WGB HS            | 421.2 (778.6)    | N/A       |
| UMMS3       | Patient | UMMS      | N/A                    | 2014    | WGB HS            | 521.9 (749.4)    | N/A       |
| UMMS4       | Patient | UMMS      | N/A                    | 2014    | WGB HS            | 691.1 (1120.4)   | N/A       |
| UMMS5       | Patient | UMMS      | N/A                    | 2014    | WGB HS            | 974.5 (1389.4)   | N/A       |
| ND11        | Patient | Mayo      | North Dakota           | 2003    | None              | 32.3 (41.6)      | N/A       |
| WI07        | Patient | Mayo      | Wisconsin              | 2002    | None              | 10.5 (17.5)      | N/A       |
| MNBO10      | Patient | Mayo      | Minnesota              | 2005    | None              | 11.1 (17.6)      | N/A       |
| Gray        | HSPS    | N/A       | Nantucket              | 1969    | None              | 45.0 (67.8)      | Nan       |
| Peabody     | HSPS    | N/A       | Nantucket              | 1973    | None              | 49.9 (74.0)      | Nan       |
| GI1986      | HSPS    | N/A       | Nantucket              | 1986    | None              | 9.4 (17.6)       | Nan       |
| GI1990      | HSPS    | N/A       | Nantucket, MA          | +4yrs   | None              | 60.67 (82.5)     | Nan       |
| GI2004      | HSPS    | N/A       | Nantucket, MA          | +18 yrs | None              | 66.1 (102.6)     | Nan       |
| GI2014      | HSPS    | N/A       | Nantucket, MA          | +28 yrs | None              | 17.9 (23.1)      | Nan       |
| RMNS1997    | HSPS    | N/A       | Nantucket, MA          | 1997    | None              | 111.2 (183.3)    | Nan       |
| RMNS2001    | HSPS    | N/A       | Nantucket, MA          | +4 yrs  | None              | 217.3 (274.5)    | Nan       |
| MGH2001     | HSPS    | MGH       | N/A                    | 2001    | None              | 119.2 (166.2)    | N/A       |
| MN-1        | HSPS    | Minnesota | N/A                    | 1995    | None              | 89.2 (172.8)     | N/A       |
| BWH2014     | HSPS    | NCH/BWH   | N/A                    | 2014    | None              | 149.2 (216.6)    | N/A       |
| BWH2003     | HSPS    | BWH       | N/A                    | 2003    | None              | 34.4 (49.0)      | N/A       |
| MORNS       | HSPS    | MWH       | N/A                    | 2015    | SureSelect        | 185.6 (205.7)    | N/A       |
| PI2000      | Tick    | N/A       | Prudence Island, RI    | 2000    | SureSelect        | 220.5 (3312.1)   | N/A       |
| SandyNeck   | Tick    | N/A       | Sandy Neck, MA         | 1998    | SureSelect        | 298.8 (449.2)    | SN        |
| MYS-Russia  | Vole    | N/A       | Ural Mountains, Russia | 1998    | None              | 20.4 (51.4)      | N/A       |
| CR400       | Vole    | N/A       | Alaska                 | 2001    | None              | De novo assembly | N/A       |
| AW1         | HSRS    | N/A       | Awaji, Japan           | 2001    | None              | De novo assembly | N/A       |
| Hobetsu     | HSRS    | N/A       | Hobetsu, Japan         | 2001    | None              | De novo assembly | N/A       |

337

338

339 List of strains with date and place of origin, enrichment method (if applicable) and  
340 coverage (mean and standard deviation). The Gray<sup>1</sup>, Peabody<sup>36</sup>, and GI<sup>40</sup> strains were  
341 isolated from the initial cases of babesiosis reported on Nantucket. MN-1 was isolated  
342 from a Minnesota resident<sup>21</sup>. PI2000 and SN1988 were collected from Prudence Island  
343 and Sandy Neck (on Cape Cod, MA)<sup>13</sup>. Mys-Russia was isolated from the Ural  
344 Mountains<sup>9</sup>. CR400 was isolated from Alaska<sup>8</sup>, and AW-1 and Hobetsu were isolated  
345 from Japan.<sup>5</sup>

346 Abbreviations: HSPS = Hamster Strain from Patient Sample; HSRS = Hamster strain  
347 from rodent sample. BWH = Brigham and Women's Hospital; MGH = Massachusetts  
348 General Hospital; NCH = Nantucket Cottage Hospital; MWH = Melrose Wakefield

349 Hospital; UMMS = University of Massachusetts Medical School; WGB HS = Whole  
350 Genome Bait Hybrid Select. CT/RI = Connecticut/Rhode Island. SN = Sandy Neck. PI =  
351 Prudence Island. VNTR = variable nucleotide tandem repeat.  
352  
353

354 **Supplementary Table 2: Discordant Loci on Chromosome 2**  
355

| <b>Discordant Loci</b>            | <b>Genome-Wide</b> | <b>Chromosome 2 Regions</b> |
|-----------------------------------|--------------------|-----------------------------|
| MNE allele = Nantucket allele     | 1202               | 64                          |
| Midwest allele = MNE allele       | 5                  | 35                          |
| Midwest allele = Nantucket allele | 16                 | 20                          |

356  
357

358 Table S2. Number of loci with discordant fixed alleles among the three CUS populations  
359 (MNE, Nantucket and Midwest), broken down by the populations that share an allele.  
360 The genome-wide values exclude the two regions on chromosome 2.  
361



## Supplemental Table 3: Chromosomal regions of elevated variation

| Chromosome   | Start   | End     | Genes Contained            | Description                                                          |
|--------------|---------|---------|----------------------------|----------------------------------------------------------------------|
| Chromosome 1 | 160007  | 161007  | BBM_I00435                 |                                                                      |
| Chromosome 1 | 547024  | 548024  | BBM_I01510                 |                                                                      |
| Chromosome 1 | 548024  | 549024  |                            |                                                                      |
| Chromosome 1 | 939041  | 940041  | BBM_I02590                 | solute carrier family 25 (mitochondrial carrier; adenine nucleotide  |
| Chromosome 1 | 1303057 | 1304057 | BBM_I03535                 | BMN family (1)                                                       |
| Chromosome 2 | 0       | 776     | BBM_I00005                 | BMN family (1)                                                       |
| Chromosome 2 | 1776    | 2777    | BBM_I00010                 | BMN family (2)                                                       |
| Chromosome 2 | 2777    | 3777    | BBM_I00010                 | BMN family (2)                                                       |
| Chromosome 2 | 3777    | 4777    | BBM_I00015                 | Vesa-like                                                            |
| Chromosome 2 | 292789  | 293789  | BBM_I00780                 |                                                                      |
| Chromosome 2 | 527800  | 528800  | BBM_I01465                 |                                                                      |
| Chromosome 2 | 1467841 | 1468841 | BBM_I01485, BBM_I01490     |                                                                      |
| Chromosome 2 | 1470841 | 1471841 | BBM_I01495                 | tRNA dimethylallyltransferase [EC:2.5.1.75]                          |
| Chromosome 2 | 1472841 | 1473841 | BBM_I04200                 | exosome complex exonuclease DIS3/RRP44 [EC:3.1.13.-]                 |
| Chromosome 2 | 1480842 | 1481842 | BBM_I04220                 |                                                                      |
| Chromosome 2 | 1482842 | 1483842 |                            |                                                                      |
| Chromosome 2 | 1483842 | 1484842 |                            |                                                                      |
| Chromosome 2 | 1484842 | 1485842 | BBM_I04225, BBM_I04230     | BBM_I04230 - DDX54, DBP10, ATP-dependent RNA helicase DDX54/DBP10    |
| Chromosome 2 | 1485842 | 1486842 | BBM_I04230                 | DDX54, DBP10, ATP-dependent RNA helicase DDX54/DBP10                 |
| Chromosome 2 | 1486842 | 1487842 |                            |                                                                      |
| Chromosome 2 | 1488842 | 1489842 |                            |                                                                      |
| Chromosome 2 | 1490842 | 1491842 | BBM_I04235                 | translation initiation factor IF-2                                   |
| Chromosome 2 | 1492842 | 1493842 | BBM_I04240                 |                                                                      |
| Chromosome 2 | 1493842 | 1494842 | BBM_I04245                 |                                                                      |
| Chromosome 2 | 1495842 | 1496842 | BBM_I04250, BBM_I04255     |                                                                      |
| Chromosome 2 | 1496842 | 1497842 | BBM_I04255, BBM_I04260     | BBM_I04260 - BMN family (1)                                          |
| Chromosome 2 | 1497842 | 1498842 | BBM_I04260                 | BMN family (1)                                                       |
| Chromosome 2 | 1498842 | 1499842 | BBM_I04265                 | BMN family (2)                                                       |
| Chromosome 2 | 1501842 | 1502843 | BBM_I04270                 | Tpr related protein, putative                                        |
| Chromosome 2 | 1504843 | 1505843 | BBM_I04280                 | BMN family (2)                                                       |
| Chromosome 2 | 1505843 | 1506843 | BBM_I04280                 | BMN family (2)                                                       |
| Chromosome 2 | 1506843 | 1507843 |                            |                                                                      |
| Chromosome 2 | 1507843 | 1508843 | BBM_I04285                 |                                                                      |
| Chromosome 3 | 3458    | 4458    | BBMIII_00015               | Tpr related protein, putative                                        |
| Chromosome 3 | 4458    | 5458    | BBMIII_00020               | BMN family (2)                                                       |
| Chromosome 3 | 6458    | 7458    | BBMIII_00020               | BMN family (2)                                                       |
| Chromosome 3 | 90462   | 91462   | BBMIII_00255               | BMN family (2)                                                       |
| Chromosome 3 | 91462   | 92462   | BBMIII_00255               | BMN family (2)                                                       |
| Chromosome 3 | 93462   | 94462   |                            |                                                                      |
| Chromosome 3 | 272470  | 273470  | BBMIII_00785               | BMN family (1)                                                       |
| Chromosome 3 | 280470  | 281470  |                            |                                                                      |
| Chromosome 3 | 307471  | 308471  | BBMIII_00885               |                                                                      |
| Chromosome 3 | 458478  | 459478  | BBMIII_01295               | CCR4-NOT transcription complex subunit 1                             |
| Chromosome 3 | 1232512 | 1233512 |                            |                                                                      |
| Chromosome 3 | 1459522 | 1460522 | BBMIII_04060               |                                                                      |
| Chromosome 3 | 1460522 | 1461522 | BBMIII_04065, BBMIII_04070 | BBMIII_04070 - splicing factor 45                                    |
| Chromosome 3 | 1743534 | 1744535 | BBMIII_04820, BBMIII_04825 | BBMIII_04825 - DNA-directed RNA polymerase II subunit A [EC:2.7.7.6] |
| Chromosome 3 | 1751535 | 1752535 |                            |                                                                      |
| Chromosome 4 | 126132  | 127132  | BBMIII_05195               |                                                                      |
| Chromosome 4 | 535150  | 536150  |                            |                                                                      |
| Chromosome 4 | 1011171 | 1012171 | BBM_III07535               | N1-15 protein, maltose-cross seroactive antigen                      |
| Chromosome 4 | 1012171 | 1013171 | BBM_III07535               | N1-15 protein, maltose-cross seroactive antigen                      |
| Chromosome 4 | 1013171 | 1014171 | BBM_III07535               | N1-15 protein, maltose-cross seroactive antigen                      |
| Chromosome 4 | 1014171 | 1015171 | BBM_III07535               | N1-15 protein, maltose-cross seroactive antigen                      |
| Chromosome 4 | 1015171 | 1016171 | BBM_III07535               | N1-15 protein, maltose-cross seroactive antigen                      |
| Chromosome 4 | 1016171 | 1017171 | BBM_III07535               | N1-15 protein, maltose-cross seroactive antigen                      |
| Chromosome 4 | 1017171 | 1018171 | BBM_III07535               | N1-15 protein, maltose-cross seroactive antigen                      |
| Chromosome 4 | 1018171 | 1019171 |                            |                                                                      |
| Chromosome 4 | 1221180 | 1222180 | BBM_III08155               |                                                                      |
| Chromosome 4 | 1222180 | 1223180 | BBM_III08155               |                                                                      |
| Chromosome 4 | 1223180 | 1224180 | BBM_III08155, BBM_III08157 |                                                                      |
| Chromosome 4 | 1549195 | 1550195 | BBM_III09150               |                                                                      |
| Chromosome 4 | 1813206 | 1814206 | BBM_III09975               | BMN family (1)                                                       |
| Chromosome 4 | 1815206 | 1816206 | BBM_III09980               | BMN family (2)                                                       |

365  
366  
367

## Supplemental Table 4: dN/dS ratios

### Strongest Positive Selection:

| Gene        | dN           | dS          | dNdS        | Z           | P           | Adjusted.P  | Description                                                        |
|-------------|--------------|-------------|-------------|-------------|-------------|-------------|--------------------------------------------------------------------|
| BBM_I00435  | 0.066647441  | 0.028337435 | 2.351922163 | 2.743518253 | 0.006078467 | 0.035782867 |                                                                    |
| BBM_I004205 | 0.048260353  | 0           | 0           | 2.320506431 | 0.020313497 | 0.070133592 |                                                                    |
| BBM_I003095 | 0.006793583  | 0           | 0           | 2.228442553 | 0.025851018 | 0.080798922 |                                                                    |
| BBM_I03535  | 0.055619019  | 0.010544974 | 5.274457541 | 2.148390578 | 0.031682741 | 0.090134164 | BMN family (1)                                                     |
| BBM_I00004  | 0.072710427  | 0.008243002 | 8.820867387 | 2.114578873 | 0.034465856 | 0.093692284 | BMN family (1)                                                     |
| BBM_I000955 | 0.042120083  | 0.00580892  | 7.250931531 | 2.029297821 | 0.042427965 | 0.105539942 |                                                                    |
| BBM_I02785  | 0.019279497  | 0           | 0           | 1.980506389 | 0.047646656 | 0.11259956  |                                                                    |
| BBM_I001305 | 0.035225402  | 0.009937892 | 3.544554835 | 1.796820985 | 0.072364044 | 0.143492551 |                                                                    |
| BBM_I000255 | 0.053908407  | 0.034401947 | 1.567016182 | 1.712735688 | 0.086761176 | 0.159933645 | BMN family (2)                                                     |
| BBM_I008865 | 0.017707341  | 0           | 0           | 1.628289273 | 0.103463563 | 0.177533489 |                                                                    |
| BBM_I003830 | 0.021225398  | 0           | 0           | 1.620646409 | 0.105093493 | 0.179446753 |                                                                    |
| BBM_I01000  | 0.018447415  | 0.004759799 | 3.875670752 | 1.606824426 | 0.108092889 | 0.18313258  |                                                                    |
| BBM_I000960 | 0.053935564  | 0.025169206 | 2.142918822 | 1.597259478 | 0.110207879 | 0.185543217 |                                                                    |
| BBM_I01510  | 0.080061241  | 0.048956297 | 1.635361446 | 1.515057934 | 0.129757733 | 0.20781512  |                                                                    |
| BBM_I004270 | 0.004628382  | 0           | 0           | 1.449321589 | 0.147247795 | 0.228372477 | Tpr related protein, putative                                      |
| BBM_I005650 | 0.0065568239 | 0           | 0           | 1.409551396 | 0.158672187 | 0.24055249  |                                                                    |
| BBM_I007835 | 0.007233399  | 0           | 0           | 1.409077296 | 0.158812314 | 0.240635179 |                                                                    |
| BBM_I01360  | 0.009367956  | 0           | 0           | 1.407553438 | 0.159263343 | 0.240674559 |                                                                    |
| BBM_I01000  | 0.0216282946 | 0           | 0           | 1.406659591 | 0.159528354 | 0.240702724 |                                                                    |
| BBM_I004145 | 0.011364126  | 0           | 0           | 1.406125034 | 0.159687    | 0.240704669 |                                                                    |
| BBM_I02865  | 0.028380027  | 0.010308514 | 2.75306688  | 1.397410523 | 0.162290157 | 0.242847996 |                                                                    |
| BBM_I01310  | 0.030778946  | 0           | 0           | 1.392066638 | 0.16390222  | 0.243989347 |                                                                    |
| BBM_I02960  | 0.074106745  | 0.024514344 | 3.022995213 | 1.346992364 | 0.177982692 | 0.25673414  |                                                                    |
| BBM_I02595  | 0.021664146  | 0           | 0           | 1.321421585 | 0.186360833 | 0.264656684 |                                                                    |
| BBM_I008115 | 0.035340247  | 0           | 0           | 1.317533019 | 0.187660021 | 0.265851696 |                                                                    |
| BBM_I003105 | 0.016411996  | 0.004650285 | 3.529245535 | 1.287934215 | 0.197768864 | 0.275579565 |                                                                    |
| BBM_I009660 | 0.054595448  | 0.02363225  | 2.310209479 | 1.253055443 | 0.21018553  | 0.288157582 |                                                                    |
| BBM_I01405  | 0.025553536  | 0           | 0           | 1.17657713  | 0.23936433  | 0.319244046 |                                                                    |
| BBM_I00955  | 0.044164741  | 0.018293871 | 2.414182315 | 1.172436736 | 0.241021758 | 0.321331609 |                                                                    |
| BBM_I02130  | 0.032136944  | 0           | 0           | 1.147037298 | 0.251366206 | 0.332074007 |                                                                    |
| BBM_I008265 | 0.023740606  | 0           | 0           | 1.144409261 | 0.252453949 | 0.332880065 |                                                                    |
| BBM_I001535 | 0.029255535  | 0.009933494 | 2.945140518 | 1.133030949 | 0.257201257 | 0.337479812 |                                                                    |
| BBM_I002900 | 0.022191581  | 0           | 0           | 1.078183498 | 0.280951875 | 0.361015475 |                                                                    |
| BBM_I006360 | 0.018339842  | 0.007118774 | 2.57626422  | 1.075075221 | 0.282341052 | 0.361749473 | N-acetylglucosaminylphosphatidylinositol deacetylase [EC:3.5.1.89] |
| BBM_I003305 | 0.01358998   | 0.0058794   | 2.311457049 | 1.071932757 | 0.283750236 | 0.3630926   |                                                                    |
| BBM_I004015 | 0.027347286  | 0.008629285 | 3.169125334 | 1.071808409 | 0.283806095 | 0.3630926   |                                                                    |
| BBM_I000885 | 0.012051583  | 0.005816191 | 2.072074776 | 1.052232596 | 0.292692848 | 0.371056593 |                                                                    |
| BBM_I003720 | 0.008867936  | 0           | 0           | 1.034481769 | 0.300910995 | 0.378993429 |                                                                    |
| BBM_I003840 | 0.01392351   | 0           | 0           | 1.025183662 | 0.305276536 | 0.383798242 |                                                                    |
| BBM_I004300 | 0.006050914  | 0           | 0           | 1.011830694 | 0.311619011 | 0.389191896 |                                                                    |
| BBM_I004280 | 0.001124228  | 0           | 0           | 0.999437518 | 0.317582793 | 0.394431943 | BMN family (2)                                                     |
| BBM_I02025  | 0.004081655  | 0           | 0           | 0.997954326 | 0.318301507 | 0.395024765 |                                                                    |
| BBM_I02355  | 0.006451702  | 0           | 0           | 0.996762059 | 0.318880019 | 0.395024765 |                                                                    |
| BBM_I000585 | 0.008196905  | 0           | 0           | 0.995882054 | 0.319307456 | 0.395024765 |                                                                    |
| BBM_I008560 | 0.015626272  | 0           | 0           | 0.992116365 | 0.321140764 | 0.395024765 |                                                                    |
| BBM_I006505 | 0.012233029  | 0.004462896 | 2.741051876 | 0.986438045 | 0.323918204 | 0.39622848  |                                                                    |
| BBM_I02345  | 0.027119277  | 0.012776338 | 2.122617456 | 0.968861846 | 0.332614124 | 0.403888579 |                                                                    |
| BBM_I000950 | 0.024534584  | 0.016089181 | 1.524911964 | 0.963947559 | 0.335072218 | 0.406024576 | deoxyhypusine monooxygenase [EC:1.14.99.29]                        |
| BBM_I02820  | 0.014253586  | 0           | 0           | 0.96052078  | 0.336793178 | 0.407119051 |                                                                    |
| BBM_I007225 | 0.063603915  | 0.028792247 | 2.20906396  | 0.949253768 | 0.342491561 | 0.412518188 |                                                                    |

368  
369  
370

## Strongest Purifying Selection:

| Gene         | dN          | dS          | dNdS        | Z            | P        | Adjusted.P  | Description                                               |
|--------------|-------------|-------------|-------------|--------------|----------|-------------|-----------------------------------------------------------|
| BBM_III05345 | 0.005977652 | 0.057142586 | 0.104609403 | -8.374889449 | 0        | 0           |                                                           |
| BBM_III06000 | 0.006174884 | 0.053529571 | 0.115354633 | -8.314808196 | 0        | 0           | E3 ubiquitin-protein ligase HUWE1 [EC:6.3.2.19]           |
| BBM_III07380 | 0.006950063 | 0.043083465 | 0.161316247 | -7.587982039 | 3.24E-14 | 3.77E-11    |                                                           |
| BBM_III02770 | 0.000962636 | 0.03854262  | 0.024975893 | -7.193801512 | 6.30E-13 | 5.49E-10    | pre-mRNA-processing factor 8                              |
| BBM_III00050 | 0.004138043 | 0.050623641 | 0.081741313 | -6.922213694 | 4.45E-12 | 3.10E-09    |                                                           |
| BBM_III01570 | 0.003455963 | 0.048836085 | 0.070766581 | -6.482868183 | 9.00E-11 | 5.23E-08    | BMN1-5B                                                   |
| BBM_III04825 | 0.001657985 | 0.049174278 | 0.033716513 | -6.336763948 | 2.35E-10 | 1.17E-07    | DNA-directed RNA polymerase II subunit A [EC:2.7.7.6]     |
| BBM_III00735 | 0.008407229 | 0.051829167 | 0.162210378 | -6.232298657 | 4.60E-10 | 2.00E-07    |                                                           |
| BBM_III00165 | 0.008616785 | 0.047383162 | 0.181853319 | -6.15125625  | 7.69E-10 | 2.98E-07    |                                                           |
| BBM_III06375 | 0.010341525 | 0.041245637 | 0.250730158 | -5.771876467 | 7.84E-09 | 2.44E-06    |                                                           |
| BBM_III00830 | 0.007992112 | 0.054522631 | 0.146583392 | -5.764871776 | 8.17E-09 | 2.44E-06    |                                                           |
| BBM_III08600 | 0.017156599 | 0.05503755  | 0.311725339 | -5.759873623 | 8.42E-09 | 2.44E-06    |                                                           |
| BBM_III01825 | 0.010170009 | 0.046231958 | 0.219977898 | -5.553132248 | 2.81E-08 | 7.52E-06    |                                                           |
| BBM_III04060 | 0.008776307 | 0.048519883 | 0.180880637 | -5.424939017 | 5.80E-08 | 1.35E-05    |                                                           |
| BBM_III01550 | 0.006469062 | 0.043987181 | 0.147066978 | -5.367119957 | 8.00E-08 | 1.74E-05    | ubiquitin carboxyl-terminal hydrolase 7 [EC:3.1.2.15]     |
| BBM_III02575 | 0.005859245 | 0.045479917 | 0.128831471 | -5.343788976 | 9.10E-08 | 1.87E-05    |                                                           |
| BBM_III03720 | 0.003134315 | 0.03959305  | 0.079163269 | -5.329088276 | 9.87E-08 | 1.91E-05    | myosin ATPase [EC:3.6.4.1]                                |
| BBM_III04225 | 0.02645499  | 0.118083799 | 0.224035728 | -5.284076192 | 1.26E-07 | 2.32E-05    |                                                           |
| BBM_III04180 | 0.006804056 | 0.081812818 | 0.083166143 | -5.256016023 | 1.47E-07 | 2.38E-05    |                                                           |
| BBM_III00795 | 0.005385592 | 0.048517274 | 0.111003599 | -5.252411581 | 1.50E-07 | 2.38E-05    |                                                           |
| BBM_III09210 | 0.008938516 | 0.035515694 | 0.25167793  | -5.249633042 | 1.52E-07 | 2.38E-05    |                                                           |
| BBM_III09715 | 0.005074705 | 0.033713098 | 0.150526213 | -5.244354684 | 1.57E-07 | 2.38E-05    |                                                           |
| BBM_III06700 | 0.010370491 | 0.047838157 | 0.216782821 | -5.188252781 | 2.12E-07 | 3.08E-05    |                                                           |
| BBM_III05535 | 0.013049775 | 0.035788342 | 0.364637587 | -5.179088536 | 2.23E-07 | 3.11E-05    | MDN1, REA1, midasin                                       |
| BBM_I02860   | 0.001604837 | 0.030468912 | 0.0526713   | -5.165930428 | 2.39E-07 | 3.21E-05    | DNA-directed RNA polymerase II subunit B [EC:2.7.7.6]     |
| BBM_III04235 | 0.02766337  | 0.119073772 | 0.232321275 | -5.146077939 | 2.66E-07 | 3.43E-05    | translation initiation factor IF-2                        |
| BBM_III01450 | 0.013996549 | 0.044950313 | 0.311378225 | -5.133974868 | 2.84E-07 | 3.53E-05    |                                                           |
| BBM_III05350 | 0.008156596 | 0.041787482 | 0.195192327 | -5.123034697 | 3.01E-07 | 3.60E-05    |                                                           |
| BBM_III06670 | 0.008217173 | 0.040671184 | 0.202039186 | -5.114025117 | 3.15E-07 | 3.60E-05    | DNA polymerase epsilon subunit 1 [EC:2.7.7.7]             |
| BBM_I01085   | 0.004309301 | 0.045387811 | 0.094944011 | -5.111170687 | 3.20E-07 | 3.60E-05    |                                                           |
| BBM_III02890 | 0.010833752 | 0.057577734 | 0.188158711 | -5.073584728 | 3.90E-07 | 4.25E-05    |                                                           |
| BBM_III08125 | 0.005281424 | 0.044128847 | 0.119681902 | -5.004413002 | 5.60E-07 | 5.80E-05    |                                                           |
| BBM_III01095 | 0.002764964 | 0.067534598 | 0.040941443 | -5.002383845 | 5.66E-07 | 5.80E-05    |                                                           |
| BBM_III04195 | 0.003796458 | 0.114824551 | 0.033063124 | -4.981805904 | 6.30E-07 | 6.27E-05    | cleavage stimulation factor subunit 2                     |
| BBM_III00990 | 0.010931533 | 0.057680288 | 0.189519386 | -4.895542589 | 9.80E-07 | 9.49E-05    |                                                           |
| BBM_III01235 | 0.007022644 | 0.04354815  | 0.161261602 | -4.888433614 | 1.02E-06 | 9.57E-05    | DNA polymerase I [EC:2.7.7.7]                             |
| BBM_I02285   | 0.004628565 | 0.044513116 | 0.103982038 | -4.865419513 | 1.14E-06 | 0.000104747 | carbamoyl-phosphate synthase [EC:6.3.5.5]/ aspartate      |
| BBM_III00980 | 0.006132812 | 0.07085804  | 0.086550681 | -4.854561364 | 1.21E-06 | 0.000107815 | 26S proteasome regulatory subunit N1                      |
| BBM_I01860   | 0.011294601 | 0.048944126 | 0.230765204 | -4.812092085 | 1.49E-06 | 0.000130129 |                                                           |
| BBM_III01295 | 0.008153357 | 0.045659099 | 0.178570249 | -4.802317185 | 1.57E-06 | 0.000133314 | CCR4-NOT transcription complex subunit 1                  |
| BBM_III02935 | 0.011340995 | 0.052825739 | 0.214686909 | -4.793939655 | 1.64E-06 | 0.000135697 |                                                           |
| BBM_I03030   | 0.005063307 | 0.04326818  | 0.117021502 | -4.71328378  | 2.44E-06 | 0.000197556 |                                                           |
| BBM_I02740   | 0.003571542 | 0.045330955 | 0.078788138 | -4.679248478 | 2.88E-06 | 0.000224402 | structural maintenance of chromosome 4                    |
| BBM_III01960 | 0.00221525  | 0.033150103 | 0.066824816 | -4.677948877 | 2.90E-06 | 0.000224402 | intron-binding protein aquarius                           |
| BBM_III04140 | 0.004930402 | 0.041286296 | 0.119419831 | -4.663479434 | 3.11E-06 | 0.000235546 | chromodomain-helicase-DNA-binding protein 1 [EC:3.6.4.12] |
| BBM_I01620   | 0.009195155 | 0.046370718 | 0.198296589 | -4.64422353  | 3.41E-06 | 0.000253113 |                                                           |
| BBM_III04250 | 0.002134682 | 0.044342385 | 0.048140897 | -4.620120799 | 3.84E-06 | 0.000278449 | splicing factor 3B subunit 1                              |
| BBM_III04460 | 0.00093518  | 0.049703808 | 0.018815056 | -4.524488554 | 6.05E-06 | 0.000430588 | elongation factor EF-2 [EC:3.6.5.3]                       |
| BBM_III03480 | 0.008051411 | 0.057408998 | 0.140246497 | -4.512957825 | 6.39E-06 | 0.00044559  |                                                           |
| BBM_I01920   | 0.004588896 | 0.038844712 | 0.11813438  | -4.480796194 | 7.44E-06 | 0.000508162 | clathrin, heavy polypeptide                               |



374 **Supplementary Table 5: Highly substituted genes**

375 A)

| Gene         | SNPs | Length | Diversity   | Z           | P           | Adjusted.P  | Description                                              |
|--------------|------|--------|-------------|-------------|-------------|-------------|----------------------------------------------------------|
| BBM_II04245  | 60   | 687    | 0.087336245 | 9.991352954 | 1.66E-23    | 5.87E-20    |                                                          |
| BBM_II04285  | 40   | 534    | 0.074906367 | 8.26855884  | 1.36E-16    | 2.39E-13    |                                                          |
| BBM_II01510  | 92   | 1356   | 0.067846608 | 7.290068755 | 3.10E-13    | 3.64E-10    |                                                          |
| BBM_III08185 | 8    | 123    | 0.06504065  | 6.901160123 | 5.16E-12    | 4.55E-09    |                                                          |
| BBM_II04230  | 168  | 2712   | 0.061946903 | 6.472363426 | 9.65E-11    | 6.81E-08    | DDX54, DBP10, ATP-dependent RNA helicase DDX54/DBP10     |
| BBM_II04255  | 39   | 645    | 0.060465116 | 6.266986273 | 3.68E-10    | 1.93E-07    |                                                          |
| BBM_II04250  | 60   | 993    | 0.060422961 | 6.261143469 | 3.82E-10    | 1.93E-07    |                                                          |
| BBM_II00425  | 90   | 1539   | 0.058479532 | 5.991782224 | 2.08E-09    | 9.16E-07    |                                                          |
| BBM_II00004  | 20   | 351    | 0.056980057 | 5.783953384 | 7.30E-09    | 2.86E-06    | BMN family (1)                                           |
| BBM_II04220  | 63   | 1128   | 0.055851064 | 5.627473744 | 1.83E-08    | 5.87E-06    |                                                          |
| BBM_II00780  | 101  | 1842   | 0.054831705 | 5.486189491 | 4.11E-08    | 1.15E-05    |                                                          |
| BBM_II03513  | 12   | 219    | 0.054794521 | 5.481035732 | 4.23E-08    | 1.15E-05    | BMN family (2)                                           |
| BBM_II02960  | 26   | 480    | 0.054166667 | 5.394014523 | 6.89E-08    | 1.74E-05    |                                                          |
| BBM_III07225 | 10   | 192    | 0.052083333 | 5.105262329 | 3.30E-07    | 7.77E-05    |                                                          |
| BBM_II04225  | 124  | 2388   | 0.051926298 | 5.083497088 | 3.71E-07    | 8.17E-05    |                                                          |
| BBM_II00435  | 100  | 1947   | 0.051361068 | 5.005155636 | 5.58E-07    | 0.000115869 |                                                          |
| BBM_II04235  | 135  | 2679   | 0.050391937 | 4.870833056 | 1.11E-06    | 0.000217874 | translation initiation factor IF-2                       |
| BBM_III03565 | 27   | 549    | 0.049180328 | 4.702902714 | 2.56E-06    | 0.000476394 |                                                          |
| BBM_II04115  | 5    | 102    | 0.049019608 | 4.680626749 | 2.86E-06    | 0.000504646 |                                                          |
| BBM_III00255 | 145  | 2991   | 0.04847877  | 4.605666004 | 4.11E-06    | 0.000690924 | BMN family (2)                                           |
| BBM_III02125 | 12   | 255    | 0.047058824 | 4.408859978 | 1.04E-05    | 0.00166691  |                                                          |
| BBM_III07964 | 18   | 387    | 0.046511628 | 4.333018088 | 1.47E-05    | 0.002256704 | CCAAT-box DNA binding protein subunit B - CBFDF_NFYB_HMF |
| BBM_II02465  | 36   | 789    | 0.045627376 | 4.210459901 | 2.55E-05    | 0.003747377 |                                                          |
| BBM_II04240  | 56   | 1242   | 0.045088567 | 4.135780323 | 3.54E-05    | 0.004901018 |                                                          |
| BBM_III08155 | 128  | 2841   | 0.045054558 | 4.131066699 | 3.61E-05    | 0.004901018 |                                                          |
| BBM_II01980  | 51   | 1134   | 0.044973545 | 4.119838173 | 3.79E-05    | 0.004955482 |                                                          |
| BBM_III02340 | 8    | 180    | 0.044444444 | 4.046504283 | 5.20E-05    | 0.006326423 |                                                          |
| BBM_III09660 | 16   | 360    | 0.044444444 | 4.046504283 | 5.20E-05    | 0.006326423 |                                                          |
| BBM_II03535  | 24   | 543    | 0.044198895 | 4.012470875 | 6.01E-05    | 0.007068175 | BMN family (1)                                           |
| BBM_III03785 | 44   | 1002   | 0.043912176 | 3.972731267 | 7.11E-05    | 0.008088604 |                                                          |
| BBM_II01535  | 24   | 549    | 0.043715847 | 3.945519909 | 7.96E-05    | 0.008781367 |                                                          |
| BBM_III00960 | 49   | 1125   | 0.043555556 | 3.923303346 | 8.73E-05    | 0.009340414 |                                                          |
| BBM_II02095  | 13   | 303    | 0.04290429  | 3.833037314 | 0.000126571 | 0.013137299 |                                                          |
| BBM_III05105 | 27   | 636    | 0.04245283  | 3.770464449 | 0.000162944 | 0.01597304  |                                                          |
| BBM_III07935 | 10   | 237    | 0.042194093 | 3.734603178 | 0.000188011 | 0.017932223 |                                                          |
| BBM_III09760 | 45   | 1068   | 0.042134831 | 3.72638949  | 0.000194242 | 0.018038964 | BMN family (2)                                           |
| BBM_III02305 | 39   | 933    | 0.041800643 | 3.68007063  | 0.000233169 | 0.021098838 |                                                          |
| BBM_III04830 | 7    | 168    | 0.041666667 | 3.661501357 | 0.000250742 | 0.022121672 |                                                          |
| BBM_II01335  | 10   | 243    | 0.041152263 | 3.590204519 | 0.000330419 | 0.02776303  |                                                          |
| BBM_III05850 | 15   | 366    | 0.040983607 | 3.566828506 | 0.000361328 | 0.029654086 |                                                          |
| BBM_III09960 | 15   | 375    | 0.04        | 3.430499601 | 0.000602471 | 0.047247104 |                                                          |
| BBM_III03525 | 55   | 1380   | 0.039855072 | 3.410412492 | 0.000648647 | 0.049762502 |                                                          |
| BBM_III07810 | 92   | 2322   | 0.039621016 | 3.37797207  | 0.000730225 | 0.054829019 |                                                          |
| BBM_III00785 | 39   | 987    | 0.039513678 | 3.363094834 | 0.000770739 | 0.05666536  | BMN family (1)                                           |
| BBM_III09725 | 18   | 459    | 0.039215686 | 3.321792893 | 0.000894411 | 0.064415813 |                                                          |
| BBM_II02825  | 63   | 1620   | 0.038888889 | 3.276498431 | 0.001051029 | 0.074181624 |                                                          |
| BBM_III07375 | 5    | 129    | 0.03875969  | 3.258591318 | 0.001119668 | 0.077476659 |                                                          |
| BBM_III02585 | 12   | 315    | 0.038095238 | 3.166497595 | 0.001542866 | 0.104707209 |                                                          |
| BBM_III06235 | 85   | 2250   | 0.037777778 | 3.122497261 | 0.001793238 | 0.117191407 |                                                          |

376

377

378

379  
380

B)

| Gene         | Diversity  | Z          | P          | Adjusted.P | Description                                                 |
|--------------|------------|------------|------------|------------|-------------------------------------------------------------|
| BBM_mt00020  | 0.00170925 | 9.77344876 | 1.46E-22   | 8.61E-20   | cytb, ubiquinol-cytochrome c reductase cytochrome b subunit |
| BBM_III09915 | 0.00153496 | 8.7351951  | 2.43E-18   | 9.54E-16   |                                                             |
| BBM_III06145 | 0.00131976 | 7.45329945 | 9.10E-14   | 2.68E-11   | histone H4                                                  |
| BBM_mt00035  | 0.0012674  | 7.14138573 | 9.24E-13   | 2.33E-10   | cox3, cytochrome c oxidase subunit 3                        |
| BBM_III00690 | 0.00119514 | 6.71099922 | 1.93E-11   | 4.55E-09   |                                                             |
| BBM_II02210  | 0.00109242 | 6.09908446 | 1.07E-09   | 1.79E-07   |                                                             |
| BBM_III08185 | 0.00095648 | 5.28932235 | 1.23E-07   | 1.88E-05   |                                                             |
| BBM_III04950 | 0.00092428 | 5.09748532 | 3.44E-07   | 4.67E-05   |                                                             |
| BBM_III04080 | 0.00090747 | 4.99738126 | 5.81E-07   | 7.60E-05   |                                                             |
| BBM_II00935  | 0.0008993  | 4.948682   | 7.47E-07   | 9.42E-05   | glutaredoxin 3                                              |
| BBM_II02225  | 0.00089498 | 4.92297356 | 8.52E-07   | 0.00010373 |                                                             |
| BBM_III09795 | 0.00088951 | 4.89038078 | 1.01E-06   | 0.00011839 |                                                             |
| BBM_III02625 | 0.00086507 | 4.74481459 | 2.09E-06   | 0.00023758 |                                                             |
| BBM_II02275  | 0.00085318 | 4.67396817 | 2.95E-06   | 0.00032581 | large subunit ribosomal protein L24e                        |
| BBM_II00295  | 0.00082457 | 4.50357352 | 6.68E-06   | 0.00071457 |                                                             |
| BBM_II02065  | 0.00081507 | 4.44695322 | 8.71E-06   | 0.00090401 | deoxyhypusine synthase [EC:2.5.1.46]                        |
| BBM_II02530  | 0.00078941 | 4.29409922 | 1.75E-05   | 0.00176857 |                                                             |
| BBM_II01885  | 0.00076786 | 4.16574759 | 3.10E-05   | 0.00288202 |                                                             |
| BBM_III00955 | 0.00068399 | 3.66618027 | 0.0002462  | 0.02227798 |                                                             |
| BBM_II01335  | 0.0006822  | 3.65551027 | 0.00025667 | 0.02264479 |                                                             |
| BBM_II02290  | 0.00067806 | 3.63083476 | 0.00028251 | 0.02431619 |                                                             |
| BBM_II03255  | 0.00066576 | 3.55758863 | 0.00037427 | 0.031448   |                                                             |
| BBM_III06620 | 0.00065243 | 3.47815505 | 0.00050488 | 0.0414352  |                                                             |
| BBM_II00005  | 0.00064561 | 3.43752688 | 0.00058705 | 0.04708427 | Tpr related protein, putative                               |
| BBM_III00785 | 0.00063572 | 3.3785905  | 0.00072858 | 0.05713721 | BMN family (1)                                              |
| BBM_III01850 | 0.00062854 | 3.33584351 | 0.00085041 | 0.06524125 |                                                             |
| BBM_II03600  | 0.00062439 | 3.31112486 | 0.00092922 | 0.06977039 | cyclin-dependent kinase regulatory subunit CKS1             |
| BBM_II02815  | 0.00060908 | 3.21995769 | 0.0012821  | 0.09426071 |                                                             |
| BBM_II01100  | 0.00057041 | 2.98957997 | 0.00279361 | 0.19717321 |                                                             |
| BBM_II01460  | 0.00056325 | 2.94691331 | 0.00320963 | 0.22209392 |                                                             |
| BBM_III00590 | 0.00055258 | 2.88339817 | 0.0039341  | 0.26195155 |                                                             |
| BBM_II01055  | 0.00054711 | 2.85080772 | 0.00436083 | 0.27980691 |                                                             |
| BBM_II01270  | 0.00053958 | 2.80591416 | 0.00501741 | 0.31618615 |                                                             |
| BBM_III00080 | 0.00053476 | 2.77721638 | 0.00548267 | 0.3394444  | prefoldin alpha subunit                                     |
| BBM_III05115 | 0.00052627 | 2.72665361 | 0.00639802 | 0.38268813 |                                                             |
| BBM_II01490  | 0.00052216 | 2.70213834 | 0.00688951 | 0.40468164 |                                                             |
| BBM_II00955  | 0.00052131 | 2.69707917 | 0.00699506 | 0.40468164 |                                                             |
| BBM_III01965 | 0.00051886 | 2.68250022 | 0.00730741 | 0.41593309 |                                                             |
| BBM_II00310  | 0.00051388 | 2.65285931 | 0.00798131 | 0.44708021 |                                                             |
| BBM_II02135  | 0.00051191 | 2.64108586 | 0.00826408 | 0.45068299 |                                                             |
| BBM_III06860 | 0.00051165 | 2.6395733  | 0.00830105 | 0.45068299 |                                                             |
| BBM_II02395  | 0.00050515 | 2.60082316 | 0.00930004 | 0.49727022 |                                                             |
| BBM_II01845  | 0.00050383 | 2.59300234 | 0.00951421 | 0.50112919 |                                                             |
| BBM_III05330 | 0.00050235 | 2.58415856 | 0.00976169 | 0.50660303 |                                                             |
| BBM_II02610  | 0.00049894 | 2.56382126 | 0.01035268 | 0.52948729 |                                                             |
| BBM_III03830 | 0.00049782 | 2.55720004 | 0.01055185 | 0.53196408 |                                                             |
| BBM_III04280 | 0.00049546 | 2.54314148 | 0.01098607 | 0.54605427 |                                                             |
| BBM_III06190 | 0.00049338 | 2.53072291 | 0.01138277 | 0.55791397 |                                                             |
| BBM_II03800  | 0.00048901 | 2.50471441 | 0.01225503 | 0.58443245 | DNA-directed RNA polymerase III subunit C11 [EC:2.7.7.6]    |
| BBM_III01725 | 0.00048901 | 2.50471441 | 0.01225503 | 0.58443245 |                                                             |

381  
382  
383  
384  
385  
386  
387

Supplemental Table 5: A) List of the 50 most substituted genes comparing Russian *B. microti* to the R1 reference. Full table available in supplemental files. B) 50 most substituted genes within the CUS samples. Full table available in supplemental files.

388 **Supplemental Table 6: BEAST estimates and Model Comparisons**

389

390 **A)**

391 **HME:**

|             | In P(model   data) | S.E.      | CUS_CLOC_IU | CUS_CLOC_G | CUS_UCED_G | CUS_UCLN_G |
|-------------|--------------------|-----------|-------------|------------|------------|------------|
| CUS_CLOC_IU | -6618014.212       | +/- 0.146 | -           | -0.542     | -22.09     | -20.713    |
| CUS_CLOC_G  | -6618012.963       | +/- 0.148 | 0.542       | -          | -21.548    | -20.171    |
| CUS_UCED_G  | -6617963.348       | +/- 0.155 | 22.09       | 21.548     | -          | 1.377      |
| CUS_UCLN_G  | -6617966.518       | +/- 0.163 | 20.713      | 20.171     | -1.377     | -          |

392

393

394 **AICM:**

|          | AICM       | S.E.      | CUS_CLOC_IU | CUS_CLOC_G | CUS_UCED_G | CUS_UCLN_G |
|----------|------------|-----------|-------------|------------|------------|------------|
| CLOC_IU  | 13236055.2 | +/- 0.086 | -           | -4.707     | -89.429    | -78.319    |
| CLOC_G45 | 13236050.4 | +/- 0.077 | 4.707       | -          | -84.723    | -73.613    |
| UCED_G45 | 13235965.7 | +/- 0.114 | 89.429      | 84.723     | -          | 11.11      |
| UCLN_G45 | 13235976.8 | +/- 0.089 | 78.319      | 73.613     | -11.11     | -          |

395

396

397

398 **B)**

| Summary Statistic           | EC     | MNE   | MW    | NAN   | REF   | CUS    | CNE   |
|-----------------------------|--------|-------|-------|-------|-------|--------|-------|
| mean                        | 1649   | 219   | 2237  | 268   | 215   | 6316   | 410   |
| stderr of mean              | 116    | 5     | 114   | 6     | 7     | 444    | 10    |
| median                      | 1293   | 177   | 1837  | 220   | 160   | 5043   | 336   |
| geometric mean              | 1357   | 186   | 1868  | 231   | 171   | 5291   | 348   |
| 95% HPD lower               | 327    | 51    | 379   | 73    | 41    | 1341   | 99    |
| 95% HPD upper               | 3933   | 499   | 5100  | 583   | 543   | 14708  | 909   |
| auto-correlation time (ACT) | 145220 | 19046 | 88392 | 19516 | 24064 | 166960 | 23842 |
| effective sample size (ESS) | 124    | 945   | 204   | 922   | 748   | 108    | 755   |

399

400

401 A) Log10 Bayes factors (BF) based on the marginal likelihood method<sup>16</sup> and Akaike  
 402 Information Criteria by Markov Chain Monte Carlo (AICM)<sup>17</sup> comparing strict clock  
 403 (CLOC), uncorrelated exponential (UCED) and uncorrelated log-normal (UCLN)  
 404 distributions for CUS samples. Positive values between compared models favor the  
 405 model in the row over the model in the column. B) Summary statistics (in years) for time  
 406 to most recent common ancestry by population for UCED (the favored model in A).  
 407 Positive values between compared models favor the model in the row over the model in  
 408 the column. HPD = highest posterior density.

409

410

411

412 **Supplemental Table 7: Non-Synonymous Variants in Relapsing Cases.** Each  
 413 relapsing case was compared to its nearest neighbor (as measured by p-distance) and  
 414 substitutions resulting in pairwise amino acid differences were identified. Variants in  
 415 which the relapsing case contained the wild-type allele are marked as WT.  
 416

| Sample    | Gene         | Chromosome    | Base         | Description                                                          | Amino Acid Substitution                                         |
|-----------|--------------|---------------|--------------|----------------------------------------------------------------------|-----------------------------------------------------------------|
| Bab05     | BBM_I00580   | chromosome 1  | 210944       | n/a                                                                  | F115L                                                           |
| Bab05     | BBM_I01510   | chromosome 1  | 547252       | n/a                                                                  | Y323C                                                           |
| Bab05     | BBM_I03030   | chromosome 1  | 1106570      | n/a                                                                  | I1294T (WT)                                                     |
| Bab05     | BBM_II02835  | chromosome 2  | 1000673      | n/a                                                                  | S221P                                                           |
| Bab05     | BBM_mt00020  | mitochondrion | 3648         | cytochrome b                                                         | L277P (shared by MORNS2015)                                     |
| Bab05     | BBM_mt00035  | mitochondrion | 7430         | cytochrome oxidase 3                                                 | H179Y                                                           |
| Bab05     | rpl4         | apicoplast    | 7864         | ribosomal subunit L4                                                 | R86H                                                            |
| Bab14     | BBM_I00115   | chromosome 1  | 37648        | n/a                                                                  |                                                                 |
| Bab14     | BBM_I02075   | chromosome 1  | 762763       | inorganic pyrophosphatase<br>coatomer protein complex, subunit alpha | P264S                                                           |
| Bab14     | BBM_I03445   | chromosome 1  | 1264406      | (xenin)                                                              | A924V                                                           |
| Bab14     | BBM_I03460   | chromosome 1  | 1269400      | n/a                                                                  | D355G                                                           |
| Bab14     | BBM_mt00020  | mitochondrion | 3177         | cytochrome b                                                         | Y120C                                                           |
| Bab14     | rpl4         | apicoplast    | 7863         | ribosomal subunit L4                                                 | R86C                                                            |
| MGH2001   | BBM_I00213   | chromosome 1  | 60729        | Cystein Rich Modular Protein, CRMP                                   | W335L                                                           |
| MGH2001   | BBM_III02665 | chromosome 3  | 943961       | n/a                                                                  | L21I                                                            |
| MGH2001   | BBM_III03370 | chromosome 3  | 1190774      | n/a                                                                  | V170A (WT)                                                      |
| MGH2001   | BBM_III03470 | chromosome 3  | 1225089      | n/a                                                                  | T300A                                                           |
| MGH2001   | BBM_III06975 | chromosome 4  | 813896       | n/a                                                                  | R655H (WT)                                                      |
| MGH2001   | BBM_III07040 | chromosome 4  | 849012       | aspartate aminotransferase                                           | P240L                                                           |
| MGH2001   | BBM_mt00020  | mitochondrion | 3102, 3220   | cytochrome b                                                         | I95S, M134I                                                     |
| BWH2003   | BBM_I01325   | chromosome 1  | 483564       | n/a                                                                  | D159N (shared by Bab15)                                         |
| BWH2003   | BBM_II01475  | chromosome 2  | 536568       | n/a                                                                  | F1998L (WT)                                                     |
| BWH2003   | BBM_II03485  | chromosome 2  | 1222818      | n/a                                                                  | S141G                                                           |
| BWH2003   | BBM_III06135 | chromosome 4  | 493919       | n/a                                                                  | A326T                                                           |
| BWH2003   | BBM_III06175 | chromosome 4  | 505781       | n/a                                                                  | D319E (WT)                                                      |
| BWH2003   | BBM_III07180 | chromosome 4  | 898529       | n/a                                                                  | S227I (shared by Bab15)                                         |
| BWH2003   | BBM_III07380 | chromosome 4  | 956965       | n/a                                                                  | T3445K                                                          |
| BWH2003   | BBM_III07915 | chromosome 4  | 37108, 11371 | n/a                                                                  | K475Q, I480N                                                    |
| BWH2003   | BBM_III09545 | chromosome 4  | 1669128      | n/a                                                                  | V82I                                                            |
| BWH2003   | BBM_mt00020  | mitochondrion | 3648         | cytochrome b                                                         | L277P                                                           |
| MORNS2015 | BBM_I00213   | chromosome 1  | 60729        | Cystein Rich Modular Protein, CRMP                                   | W335L                                                           |
| MORNS2015 | BBM_I02415   | chromosome 1  | 875249       | n/a                                                                  | E115K (shared by Bab03, Bab08,<br>Bab10, Bab12, Bab16, MGH2001) |
| MORNS2015 | BBM_I02455   | chromosome 1  | 884392       | TSR2, pre-rRNA-processing protein TSR2                               | W41C                                                            |
| MORNS2015 | BBM_I03030   | chromosome 1  | 1106570      | n/a                                                                  | I1294T (WT)                                                     |
| MORNS2015 | BBM_II00950  | chromosome 2  | 348600       | n/a                                                                  | L89I                                                            |
| MORNS2015 | BBM_II02600  | chromosome 2  | 921987       | n/a                                                                  | A283V (WT)                                                      |
| MORNS2015 | BBM_III03100 | chromosome 3  | 1110447      | mRNA (guanine-N7-)-methyltransferase                                 | L469I                                                           |
| MORNS2015 | BBM_III04730 | chromosome 3  | 1699962      | n/a                                                                  | T259M                                                           |
| MORNS2015 | BBM_mt00020  | mitochondrion | 3237         | cytochrome b                                                         | T140K                                                           |
| MORNS2015 | rpl4         | apicoplast    | 7825         | ribosomal subunit L4                                                 | S73L                                                            |

417



418 **Supplemental Table 8:** Mutations associated with atovaquone and azithromycin  
 419 resistance in other Apicomplexa and bacterial species.

420

421 A. Cytochrome B mutations associated with atovaquone resistance

| Species                                  | Position | Corresponding Position in <i>B. microti</i> | Mutation | Reference                            |
|------------------------------------------|----------|---------------------------------------------|----------|--------------------------------------|
| <i>B. gibsoni</i>                        | 108      | 121                                         | A>T      | Sakuma et al. 2009 <sup>41</sup>     |
| <i>B. gibsoni</i>                        | 121      | 134                                         | M>I      | Matsuu et al. 2006 <sup>42</sup>     |
| <i>T. gondii</i>                         | 129      | 134                                         | M>L      | McFadden et al. 2000 <sup>43</sup>   |
| <i>P. falciparum</i> , <i>P. berghei</i> | 133      | 134                                         | M>I      | Korsinczky et al. 2000 <sup>44</sup> |
| <i>P. berghei</i>                        | 144      | 145                                         | L>(F,S)  | Korsinczky et al. 2000               |
| <i>T. gondii</i>                         | 254      | 262                                         | I>L      | McFadden et al. 2000                 |
| <i>P. yoelii</i>                         | 258      | 262                                         | I>M      | Korsinczky et al. 2000               |
| <i>P. yoelii</i>                         | 267      | 271                                         | F>I      | Korsinczky et al. 2000               |
| <i>P. falciparum</i> , <i>P. yoelii</i>  | 268      | 272                                         | Y>(S,C)  | Korsinczky et al. 2000               |
| <i>P. yoelii</i>                         | 271      | 275                                         | L>V      | Korsinczky et al. 2000               |
| <i>P. falciparum</i> , <i>P. yoelii</i>  | 272      | 276                                         | K>R      | Korsinczky et al. 2000               |
| <i>P. falciparum</i>                     | 275      | 279                                         | P>T      | Korsinczky et al. 2000               |
| <i>P. falciparum</i>                     | 280      | 284                                         | G>D      | Korsinczky et al. 2000               |

422

423 B. Ribosomal protein L4 mutations associated with azithromycin resistance.

424

| Species              | Position | Corresponding Position in <i>B. microti</i> | Mutation   | Reference                                                                 |
|----------------------|----------|---------------------------------------------|------------|---------------------------------------------------------------------------|
| <i>E. coli</i>       | 63       | 80                                          | K>N, E     | Sidhu et al. 2007 <sup>45</sup> , Chittum and Champney 1994 <sup>46</sup> |
| <i>S. pneumoniae</i> | 69       | 81                                          | G>(C,T, V) | Sidhu et al. 2007                                                         |
| <i>S. pneumoniae</i> | 70       | 82                                          | T>P        | Sidhu et al. 2007                                                         |
| <i>S. pneumoniae</i> | 71       | 83                                          | G>(S, R)   | Sidhu et al. 2007                                                         |
| <i>P. falciparum</i> | 76       | 83                                          | G>V        | Sidhu et al. 2007                                                         |

425

426

427 **Supplementary Figure 1: Enrichment of *Babesia microti* DNA by three methods**

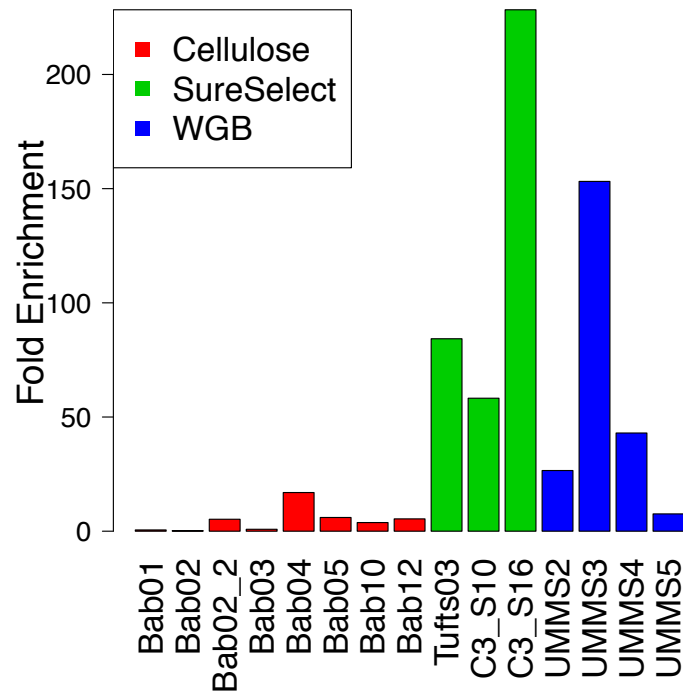

428

429

430

431

432 Fold enrichment by method for the strains which underwent an enrichment procedure.  
433 Bab02 and Bab02\_2 denote samples separated by consecutive days of collection from  
434 the same patient. Short reads from this sample were pooled in the remainder of the  
435 analyses.  
436

437 **Supplementary Figure 2: Coverage Statistics**

438 **A)**

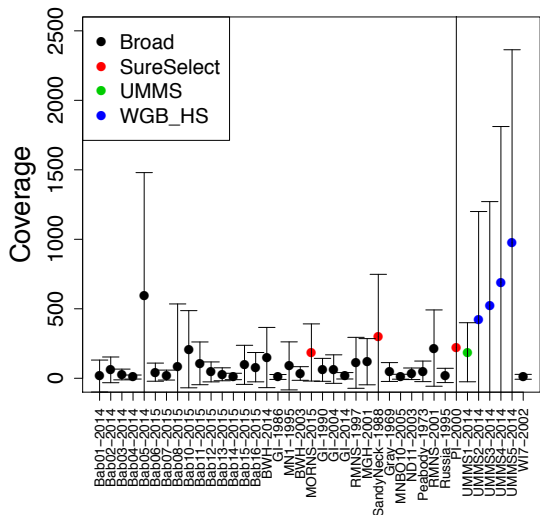

**B)**

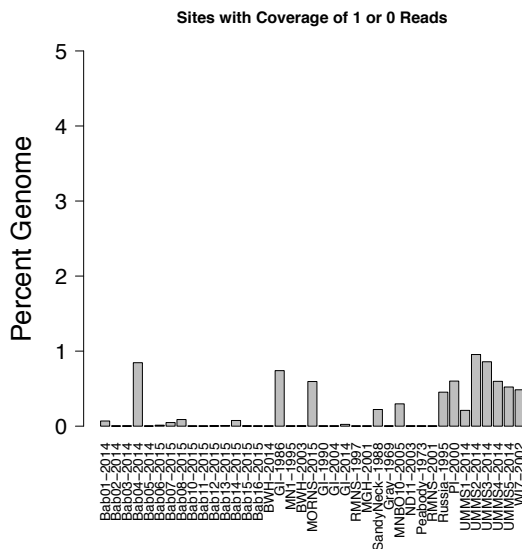

439

440 **C)**

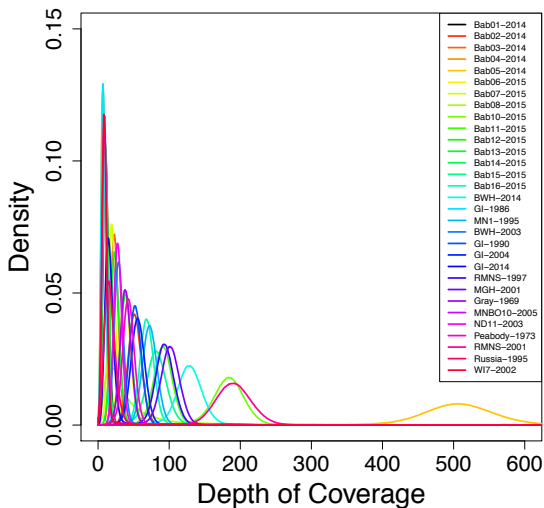

441

442

**D)**

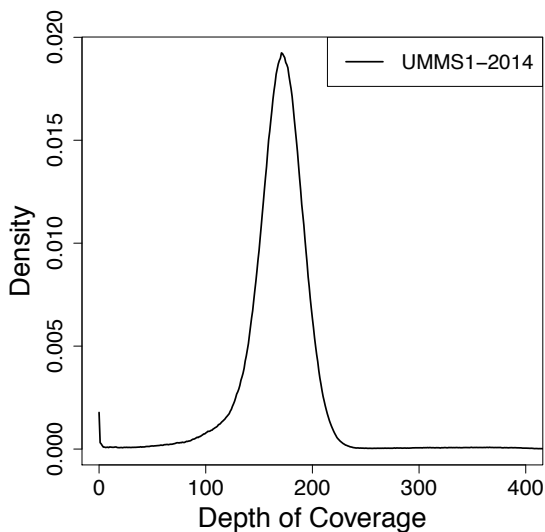

443 E)

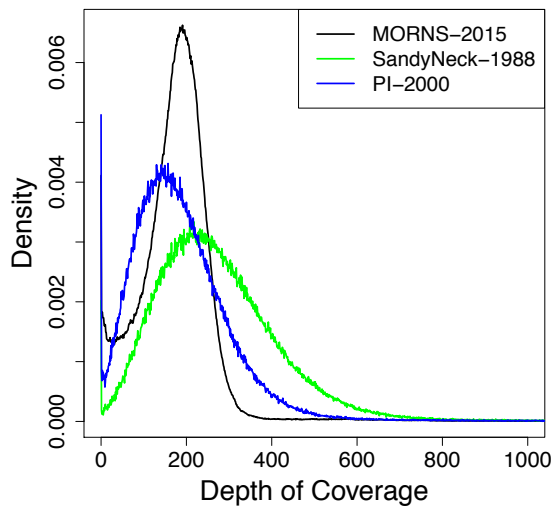

444

F)

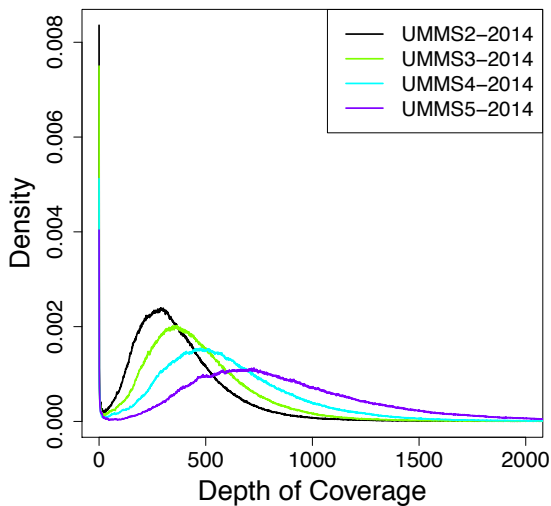

445 G)

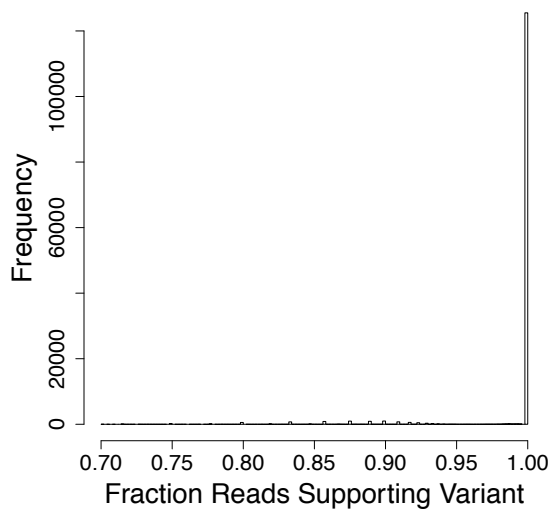

H)

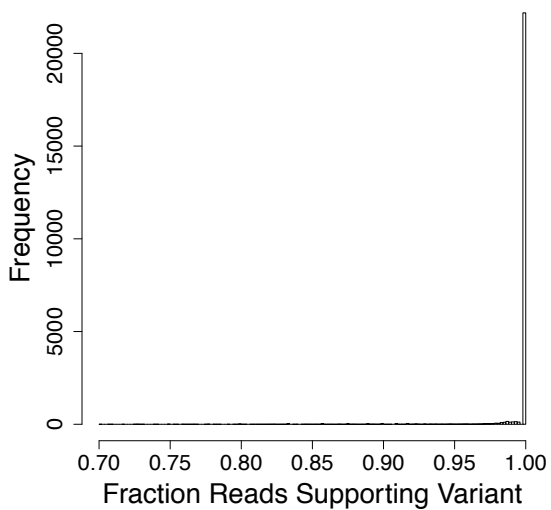

446

447 A) Mean coverage per site +/- 1SD for all of the libraries in the study B) Percentage of  
448 bases in the genome with fewer than 2 reads for each library sequenced. C-F) Coverage  
449 histograms for libraries prepared with C) Apollo protocol D) Agilent SureSelect E)  
450 TruSeq protocol and F) TruSeq protocol with hybrid selection. G) Fraction of reads  
451 supporting alternate variants in BMSS and H) CUS samples.

452

453 **Supplementary Figure 3: Additional Phylogenetic Analysis of *B. microti* samples**

454 A)

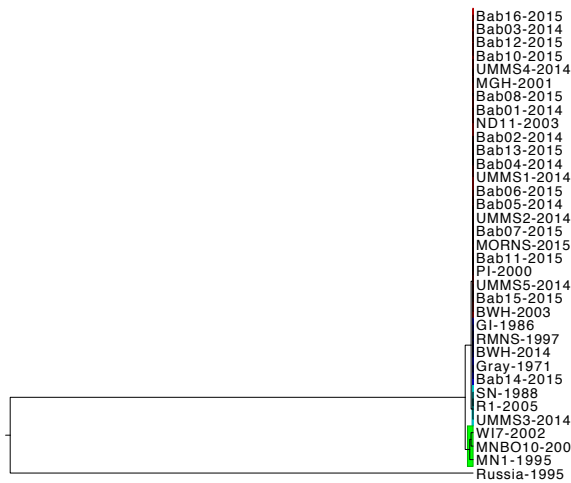

B)

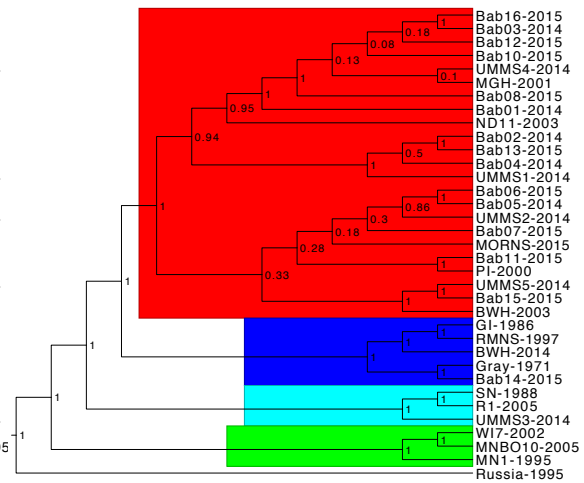

456 C)

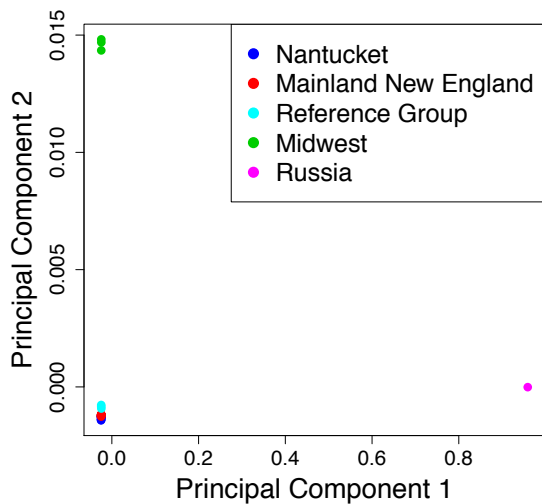

D)

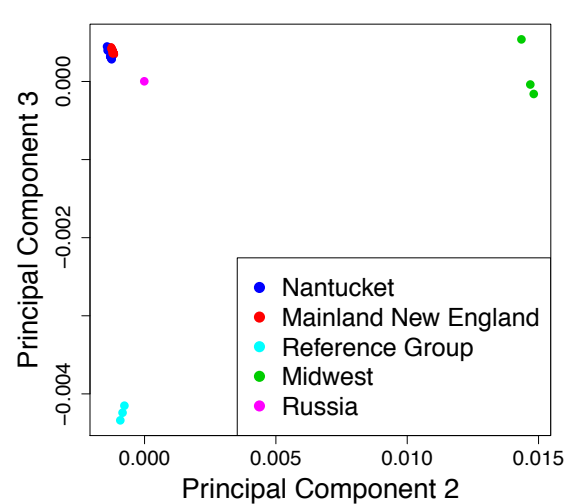

459 A) Maximum clade credibility tree from core chromosomal sequences (chromosome 2  
 460 removed – see supplement) with groups of samples colored by lineage; Green –  
 461 Midwest, Cyan – Reference Group, Blue – Nantucket, Red – Mainland New England. B)  
 462 Cladeogram of the tree in A) showing posterior support for each node. C-D) Principal  
 463 component plots of genetic relationships among strains based p-distance (i.e. the  
 464 proportion of nucleotides that differ between two sequences).

465  
 466

467 Supplemental Figure 4: Population Genetic Summary Statistics

468

469

A)

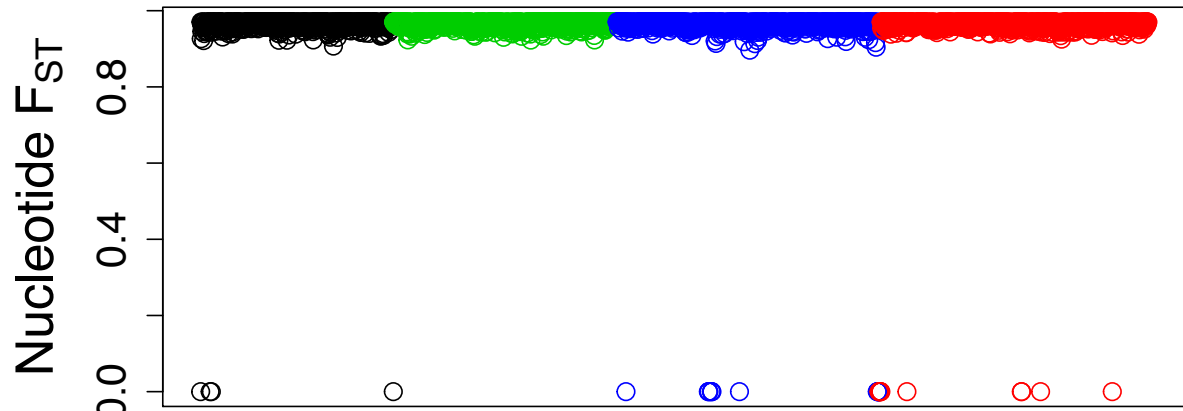

470

471

B)

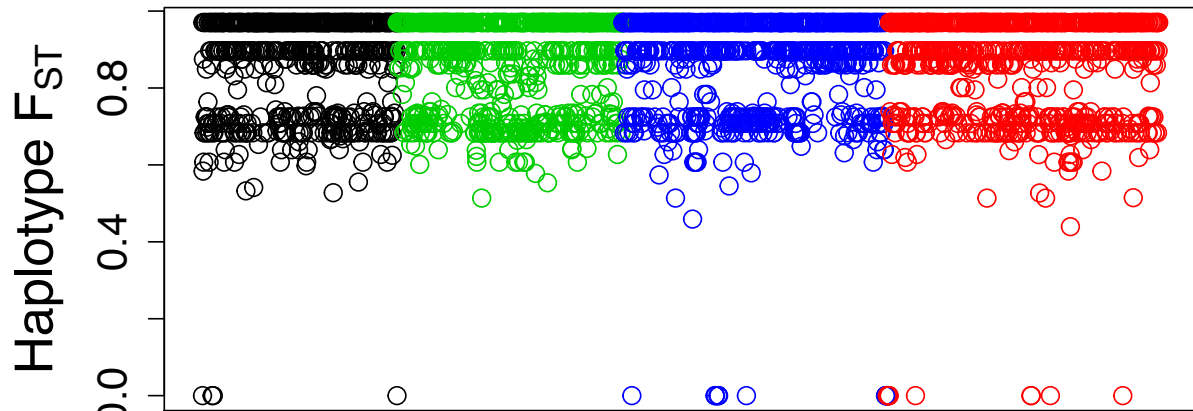

472

473

474

C)

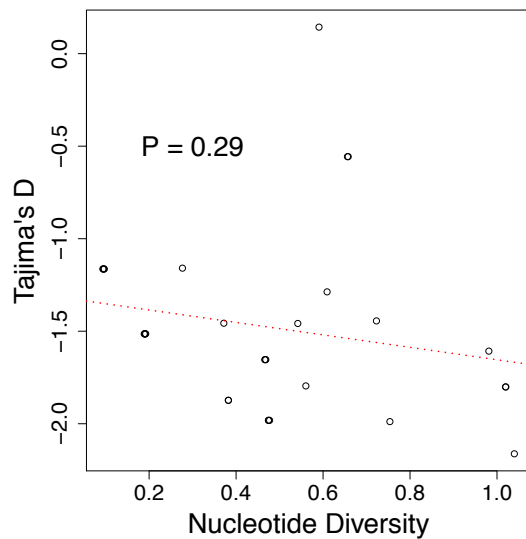

475

D)

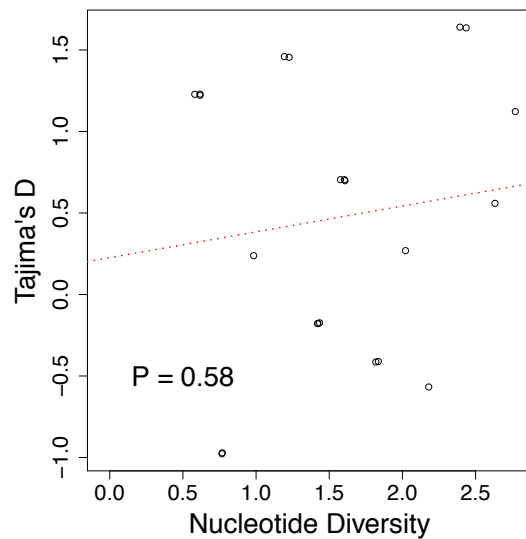

476

E)

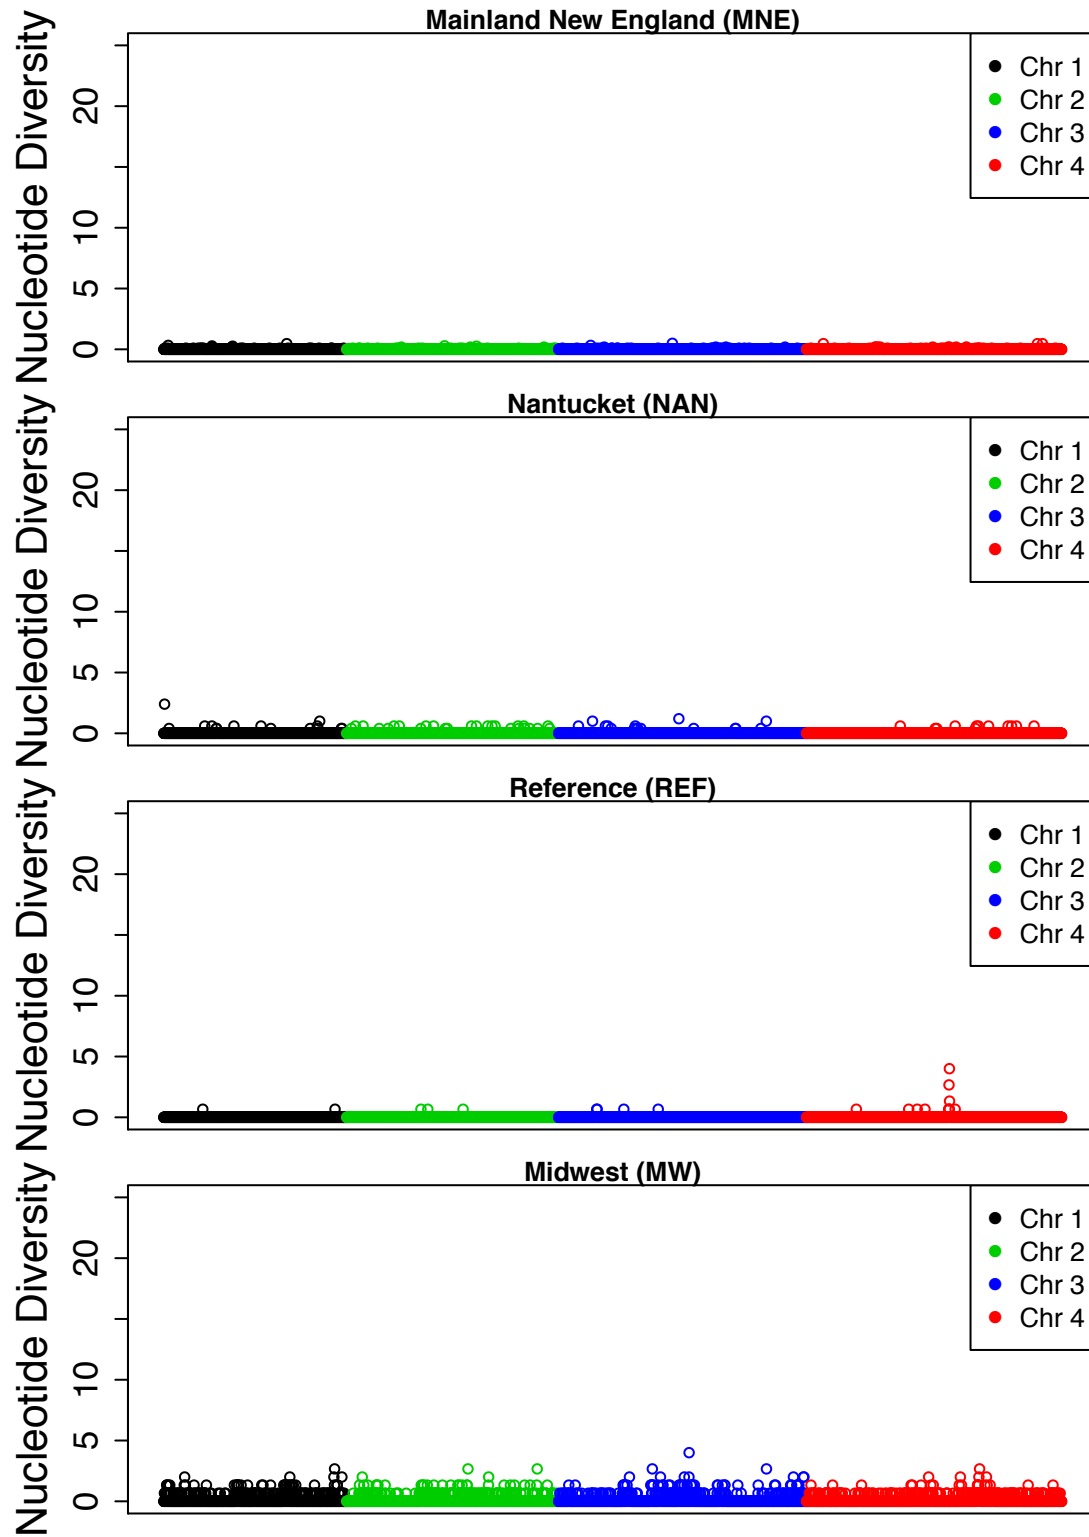

477

478

479

480 **A)** Genome-wide values of  $F_{st}$  calculated by nucleotide (upper panel) and haplotype  
481 (lower panel) methods. The x-axis shows concatenated chromosomes (chromosome 1 –  
482 black; chromosome 2 – red; chromosome 3 – green; chromosome 4 – blue). **B)**  
483 Relationship between Tajima's  $D$  and  $\pi$  for Mainland New England lineage samples; **C)**  
484 Relationship between Tajima's  $D$  and  $\pi$  for Nantucket lineage samples. **E)** Nucleotide  
485 diversity within lineages. The peak on chromosome 4 in REF corresponds to  
486 BBM\_III07535, which had extreme polymorphism such that reads aligned to the  
487 reference only for other samples within the REF group.



488 **Supplementary Figure 5: Analysis of Recombination in *B. microti***

489

A)

|              | <i>B. microti</i> sensu stricto | United States | EastCoast | Mainland New England | Nantucket |
|--------------|---------------------------------|---------------|-----------|----------------------|-----------|
| Chromosome 1 | 2.24E-06                        | 4.52E-04      | 3.71E-01  | 6.27E-01             | 1.00E+00  |
| Chromosome 2 | 2.85E-05                        | 4.52E-06      | 2.50E-01  | 2.07E-01             | 1.00E+00  |
| Chromosome 3 | 2.23E-12                        | 3.81E-05      | 9.88E-01  | 1.00E+00             | 1.00E+00  |
| Chromosome 4 | 6.22E-16                        | 3.10E-04      | 2.28E-04  | 4.61E-01             | 1.00E+00  |

490

491

B)

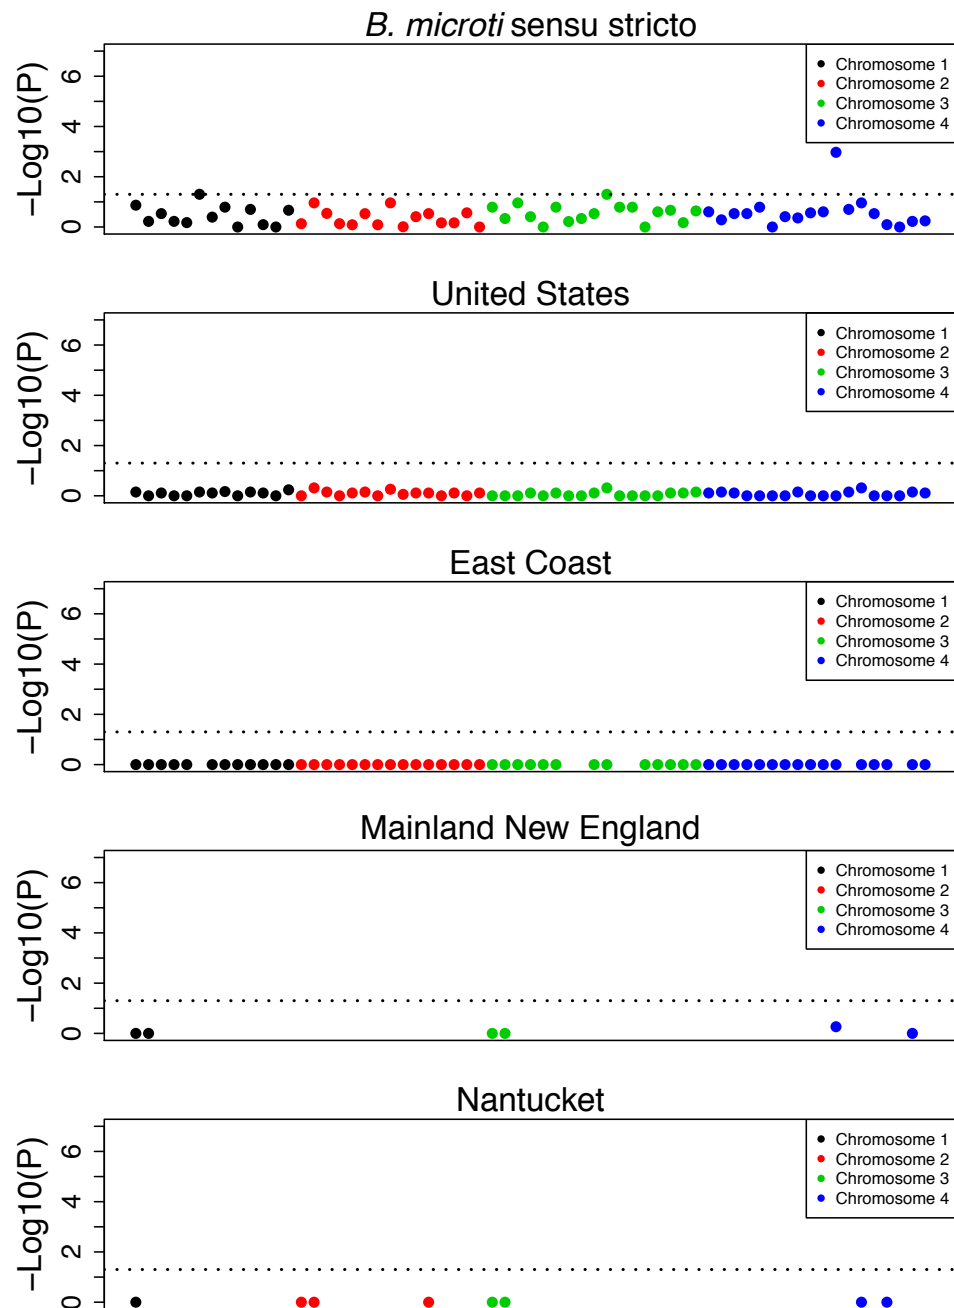

492

493

494

495

A) Results of the PHI<sup>20</sup> test for all chromosomes in each lineage. B) PHI test in 200Kb windows throughout the genome. No point is plotted if the interval contained an insufficient number of polymorphic sites to evaluate the test statistic. The test could not

496 be conducted on a lineage with three samples, so a separate panel for MW is not  
497 included. These samples are incorporated into CUS.  
498

499 **Supplementary Figure 6: Divergence Times of *B. microti***

500

501

A)

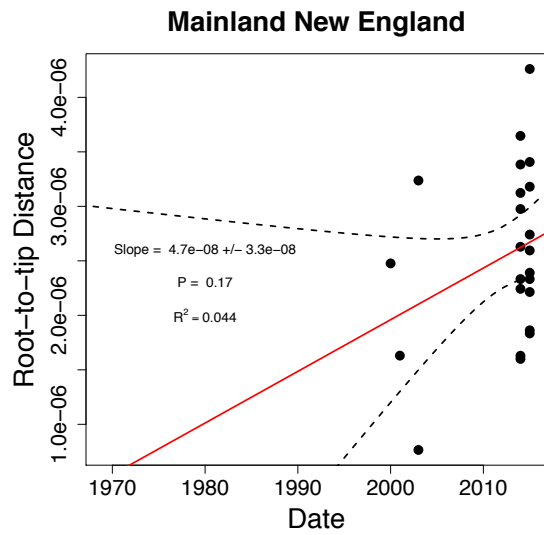

B)

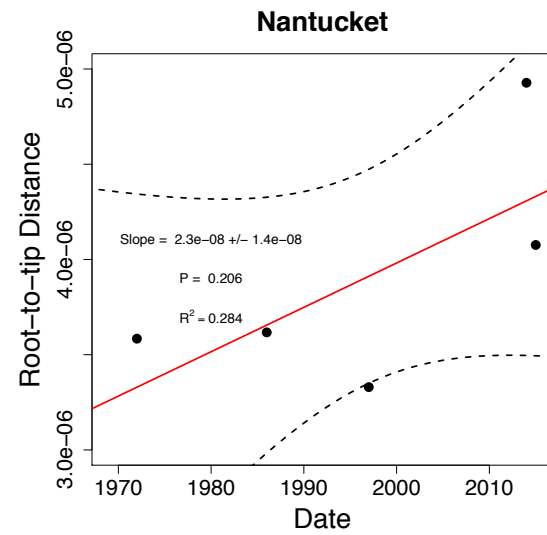

502

503

C)

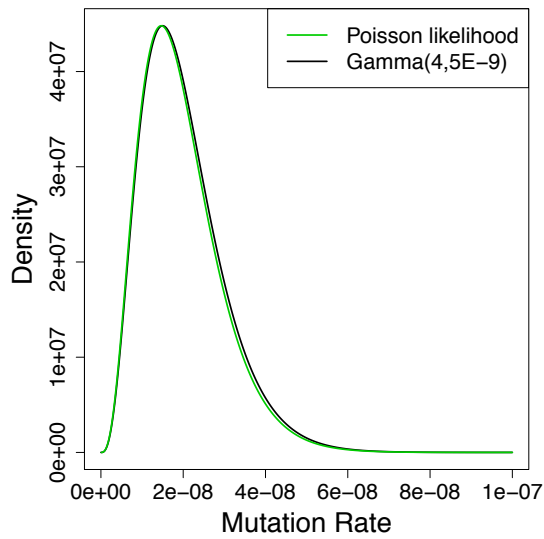

D)

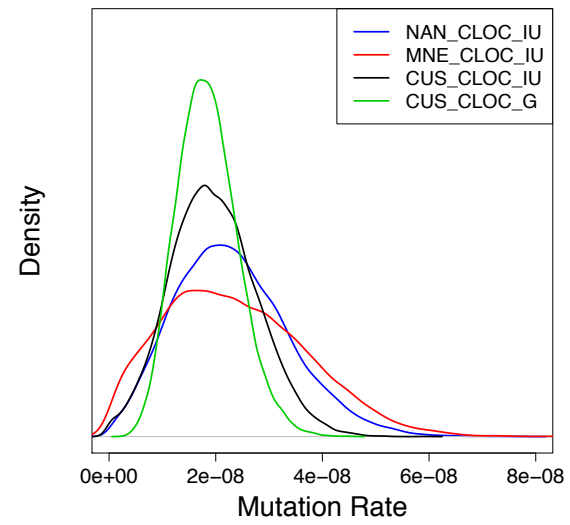

504

505

506 E)

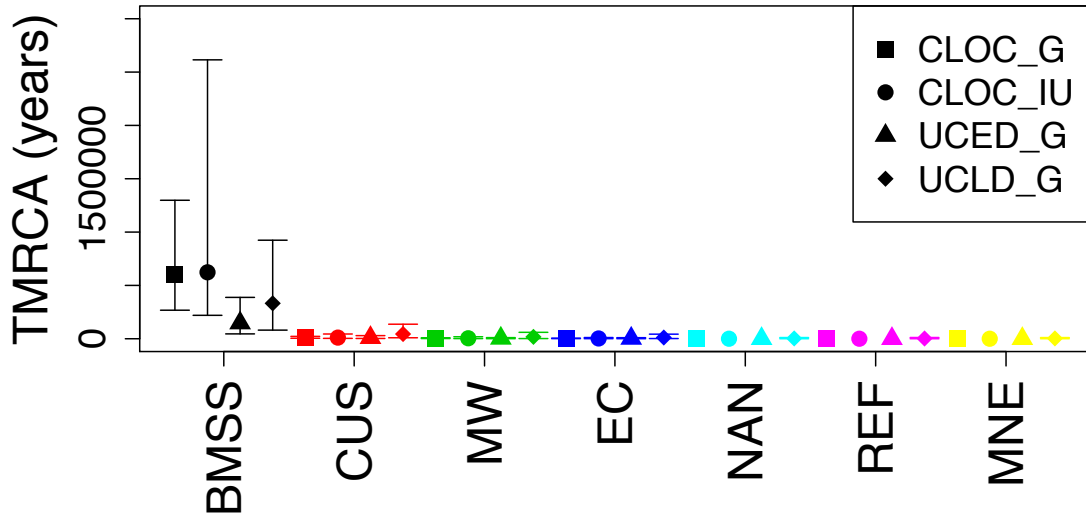

507  
508

F)

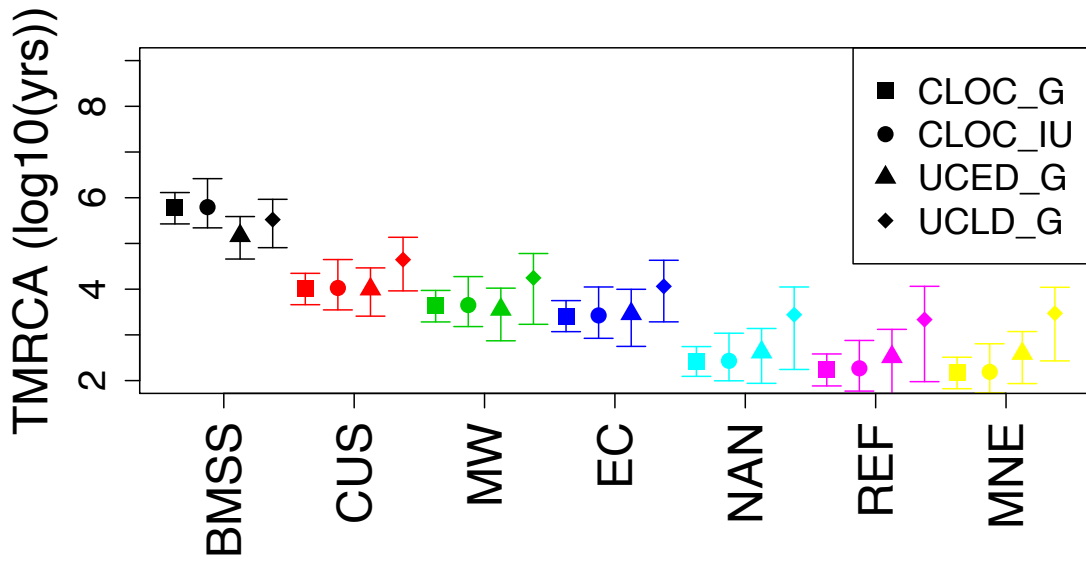

509  
510  
511

G)

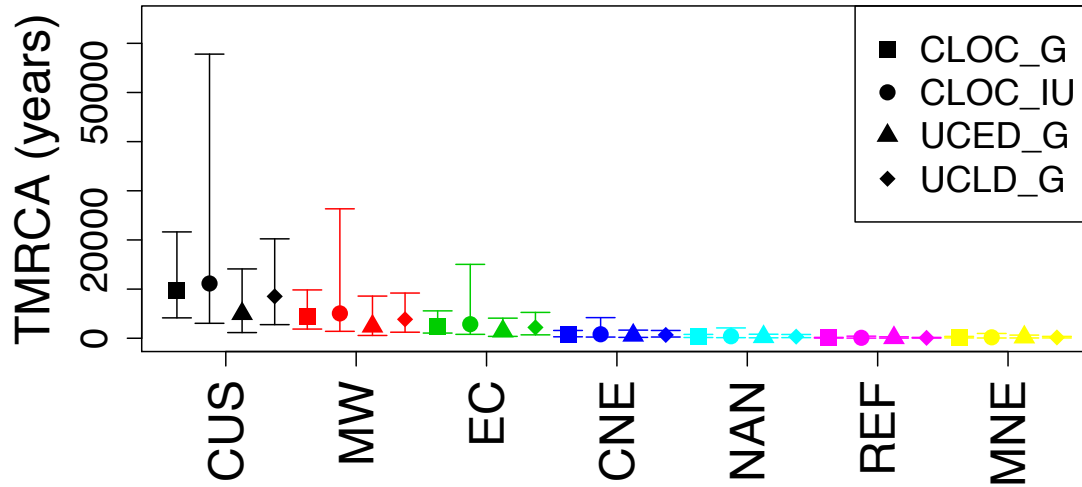

513

514

515 **A)** Root-to-tip distance for MNE and **B)** NAN samples. **C)** Poisson likelihood for empirical  
 516 rate from laboratory propagated isolates and  $\text{Gamma}(4,5 \times 10^{-9})$  which was used to  
 517 construct a prior (see supplemental note). **D)** Posterior distributions for mutation rate for  
 518 NAN and MNE lineages run independently with an uninformative (improper uniform)  
 519 prior, for CUS samples with an uninformative (improper uniform) prior, and for CUS  
 520 samples with a  $\text{Gamma}(4,5 \times 10^{-9})$  prior. TMRCA estimates for continental US lineages  
 521 are given in Figure 3c and Supplemental Table 6. **E-F)** TMRCA (median plotted as a  
 522 point, with shape denoting the model, and error bars corresponding to 95% HPD) for all  
 523 BMSS lineages are shown in E) (linear scale) and F) (log scale). **G)** TMRCA estimates  
 524 obtained under a codon-partitioned model based on an alignment of all protein coding  
 525 genes on nuclear chromosomes (median plotted as a point, with shape denoting the  
 526 model, and error bars corresponding to 95% HPD).

527

*B. microti sensu stricto*

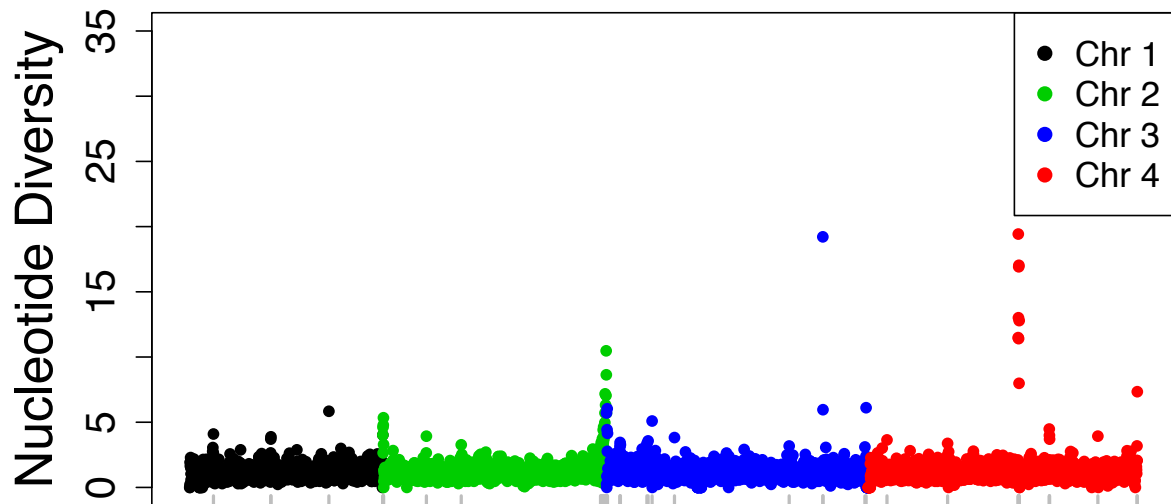

529  
530

531 Pairwise nucleotide diversity ( $\pi$ , in 1Kb bins) using the unfiltered set of variant calls  
532 (methods). Discrepancies with Figure 2a represent places where there is likely sequence  
533 variation (e.g. subtelomeric regions), but we cannot confidently call the variant. Regions  
534 marked with gray ticks were in the top 1% of diversity by bin. A list of these regions is  
535 provided in Supplemental Table 3.

536

537

538

539 **Supplementary Figure 8: Analysis of Substitution Rate, Evolution and BMN genes.**

540 **A)**

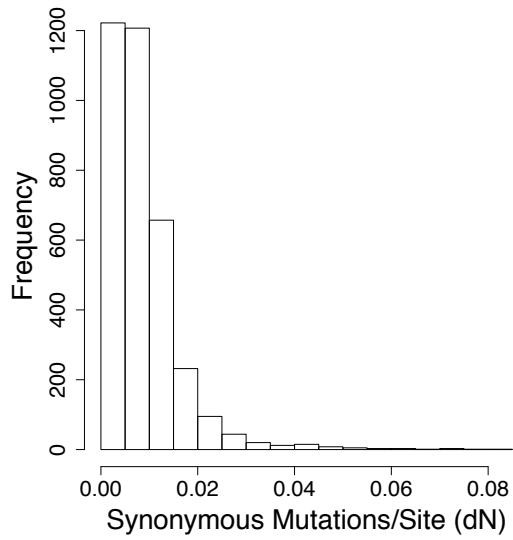

541

**B)**

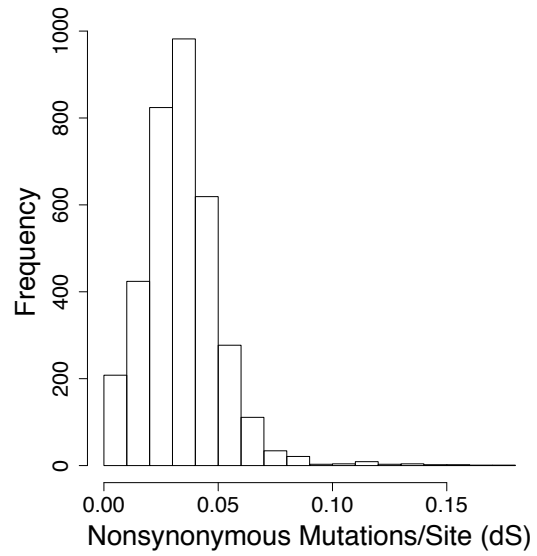

542 **C)**

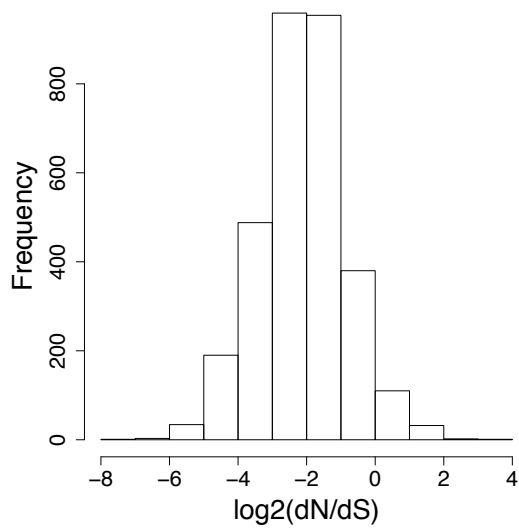

543

544

**D)**

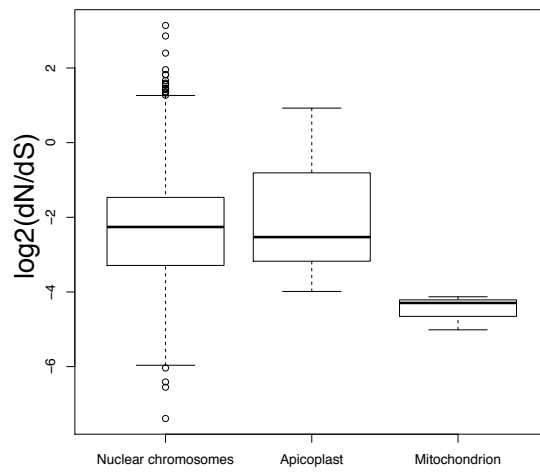

545 E)

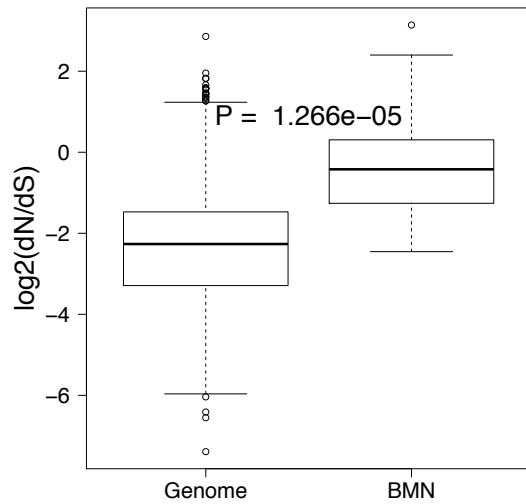

F)

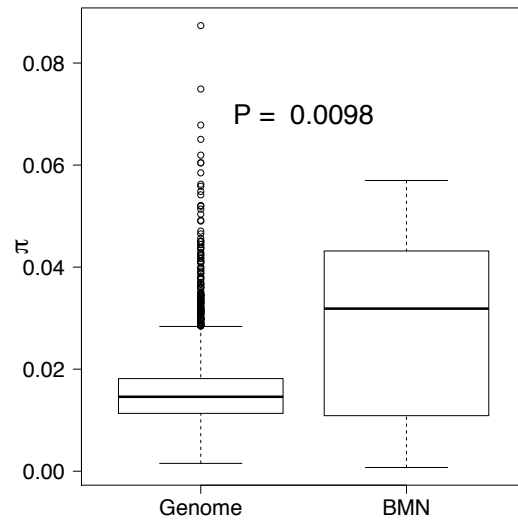

546  
547

548 A) Distribution of dS, the rate of synonymous mutations per synonymous site, B) dN, the  
549 rate of non-synonymous mutations per non-synonymous site and C) the ratio of dN/dS.  
550 D) Box-and-whisker plot showing median and 1<sup>st</sup> and 3<sup>rd</sup> quartiles of dN/dS ratio by  
551 sequence type. Whiskers extend to 1.5 times the interquartile range, or the most  
552 extreme data point, whichever is larger. E) Box-and-whisker plot showing median and 1<sup>st</sup>  
553 and 3<sup>rd</sup> quartiles for dN/dS ratios for BMN genes as compared to the genome as a whole  
554 ( $P = 1.26 \times 10^{-5}$ , Wilcoxon Rank-Sum test, two-tailed alternative). Whiskers are marked  
555 as in D. F) Box-and-whisker plot showing median and 1<sup>st</sup> and 3<sup>rd</sup> quartiles for SNP  
556 density among BMN genes compared to the genome as a whole ( $P = 9.8 \times 10^{-3}$ ,  
557 Wilcoxon Rank-Sum test, two-tailed alternative). Whiskers are marked as in D).

558

559



560 **Supplemental Figure 9: Variants Associating with Relapsing Babesiosis and**  
561 **Timeline of Parasitemia in Bab05**

562 A)

563

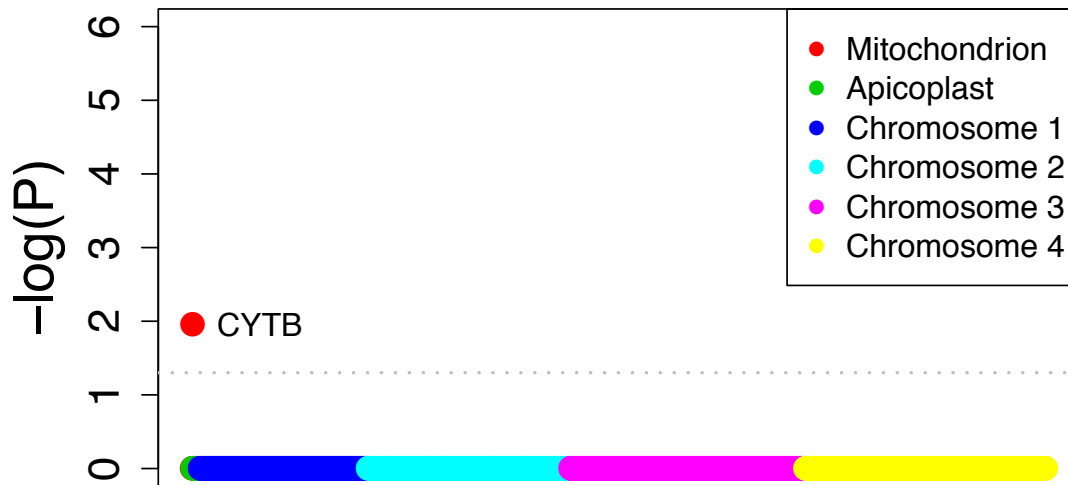

564

565 B)

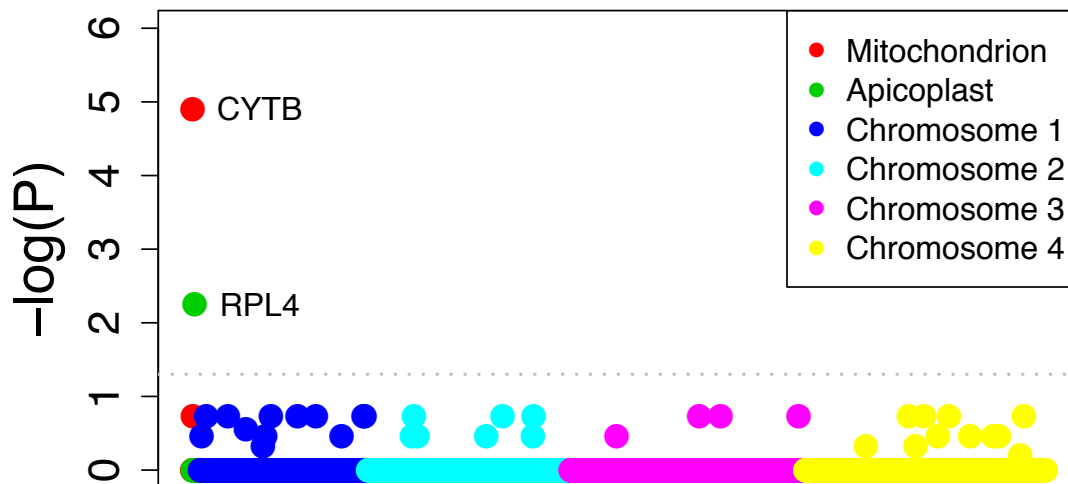

566

567

568

569

570

571

572

573

574 C)

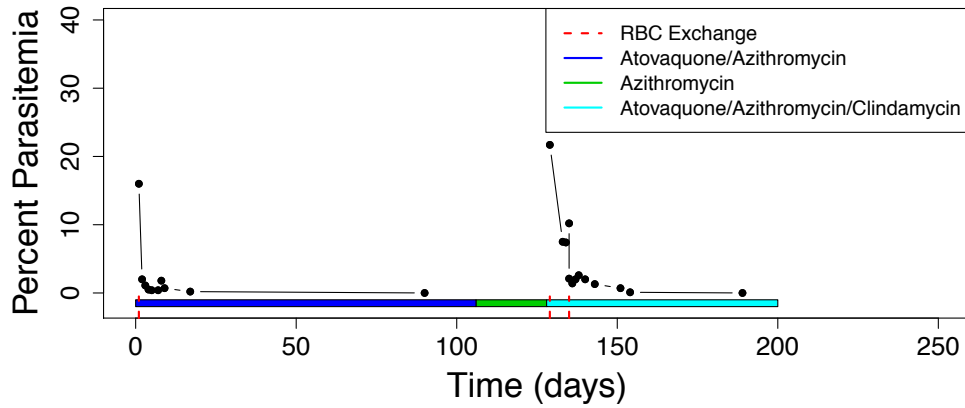

575

576

577

578 A) Fisher's exact test for association between the proportion of relapsing cases that  
579 contain a non-synonymous variant in a given protein vs. the proportion of non-relapsing  
580 cases that contain such variants. Top plot gives correct P values by the method of  
581 Benjamini and Hochberg<sup>47</sup>; uncorrected P values are in the bottom panel. C) Timeline of  
582 parasitemia and treatment for the Bab05 case.

583

584

585 **Supplementary Figure 10:** Modeling of cytochrome b mutations identified in relapsing  
586 *B. microti* cases.  
587

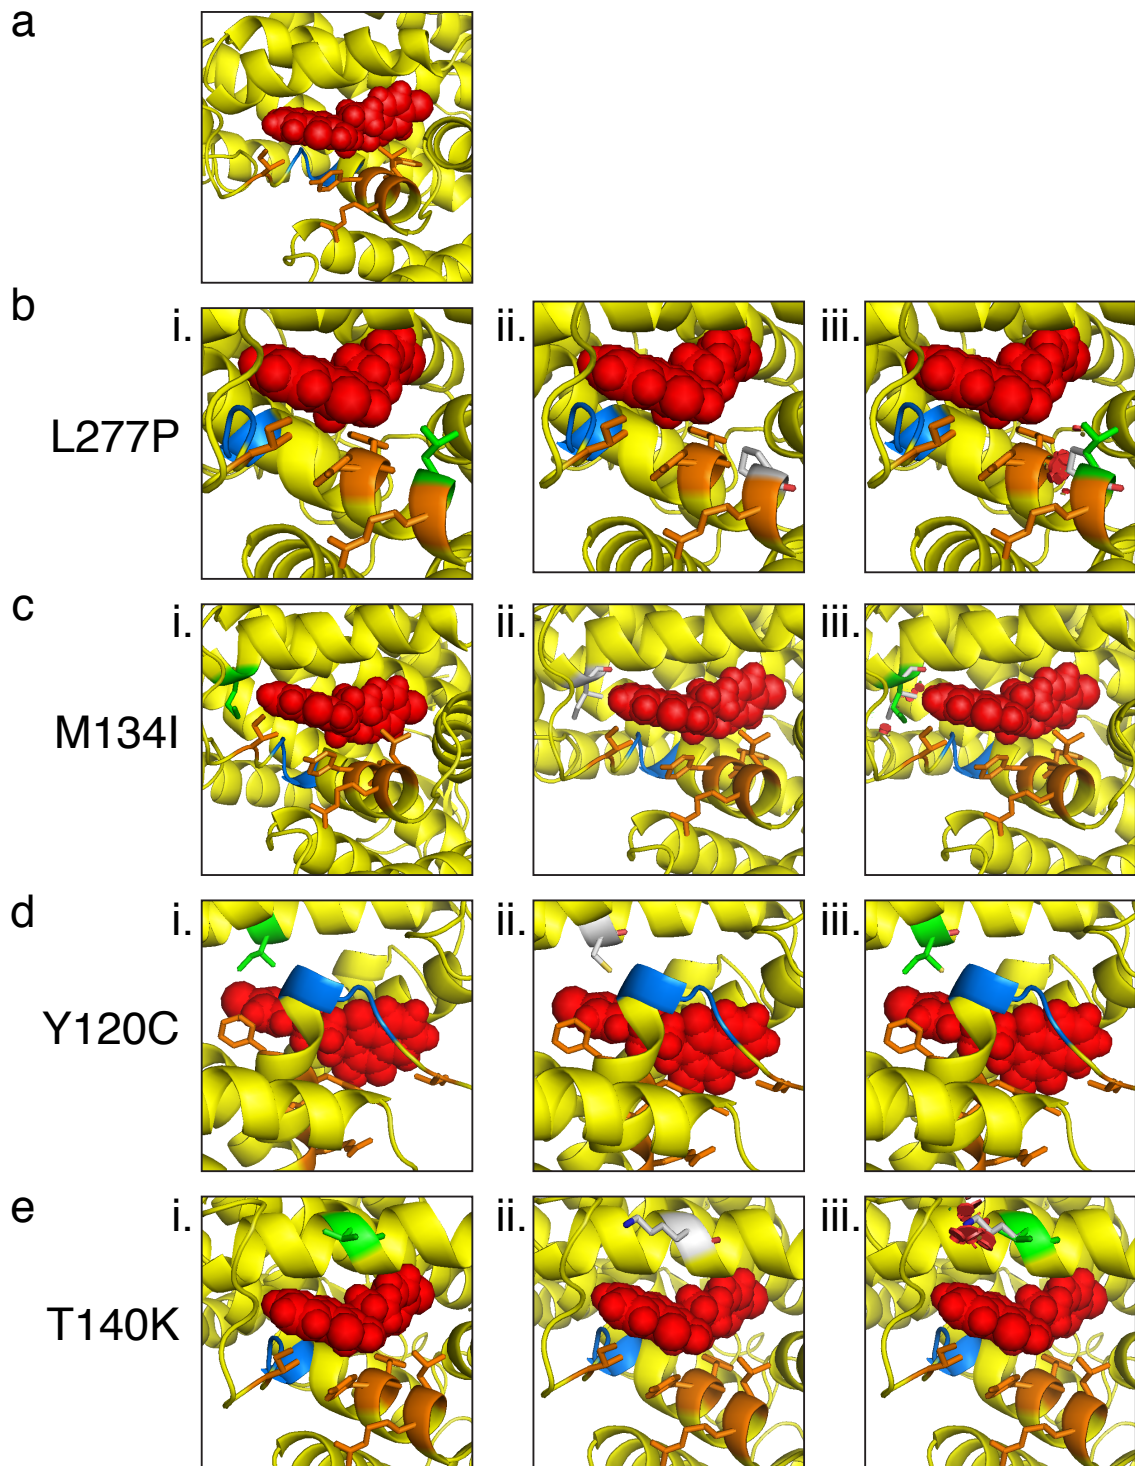

588  
589

590 The solved structure of *S. cerevisiae* cytochrome bc1 complex (yellow ribbon)  
591 complexed with atovaquone<sup>48</sup> (red) was used to model mutations found in atovaquone-  
592 resistant *B. microti*. (PDB ID: 4PD4)

593 A. Mutations conferring atovaquone resistance in *P. falciparum* have been described<sup>44</sup> in  
594 residues (orange) that are in close proximity with the atovaquone binding pocket, as well  
595 as the highly conserved PEWY motif (blue).

596 B. Visualization of L277 in *B. microti* (corresponding to L282 in the structural model),  
597 which has been colored green (i). An L>P substitution has been observed at this site in  
598 atovaquone-resistant strains Bab05 and BWH2003; the mutant residue is shown in gray  
599 (ii). The Mutagenesis wizard in Pymol was used to model the L277P mutation and the  
600 highest probability rotamer was selected for representation (iii). Red disks denote  
601 significant overlap of atomic van der Waals radii and thus indicate potential steric  
602 hindrance.

603 C. Same as in B, but modeling M134I in *B. microti* (corresponding to M139 in the  
604 structural model). The M>I substitution has been observed at this site in the atovaquone-  
605 resistant *B. microti* strain MGH2001, as well as in other Apicomplexan species.

606 D. Same as in B, but modeling Y120C in *B. microti* (corresponding to Y125 in the  
607 structural model). The Y>C substitution has been observed at this site in the  
608 atovaquone-resistant *B. microti* strain Bab14.

609 E. Same as in B, but modeling T140K in *B. microti* (corresponding to T145 in the  
610 structural model). The T>K substitution has been observed at this site in the  
611 atovaquone-resistant *B. microti* strain MORNS2015.  
612

613 **Supplementary Figure 11:** Modeling of ribosomal protein L4 mutations identified in  
614 relapsing cases

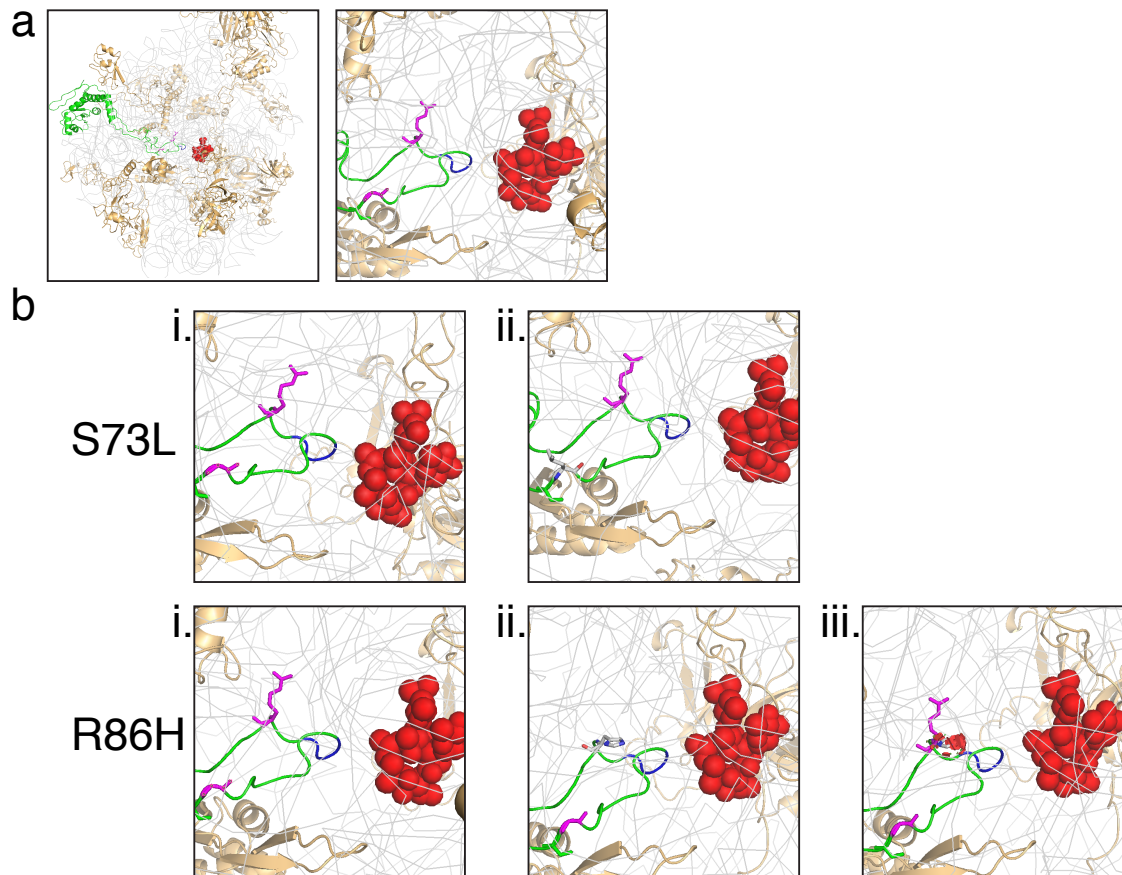

615 A. The published structure of *T. thermophilus* ribosomal protein L4<sup>49</sup> (green ribbon) was  
616 used to model *RPL4* mutations in azithromycin-resistant *B. microti* described in this  
617 study (PDB ID: 4V7Y). 23S, 16S, and 5S rRNA (gray) have been simplified to enable  
618 visualization of the interaction between L4 and azithromycin (red spheres). The positions  
619 of previously described mutations conferring azithromycin resistance in other Bacterial<sup>50</sup>  
620 and Apicomplexan<sup>45</sup> species (see Figure 4) have been highlighted in blue.  
621 B. Visualization of S73 (corresponding to G61 in the structural model), which has been  
622 colored in green (i). The *B. microti* MORNS2015 sample has an S>L substitution at this  
623 site; the mutant residue is shown in gray (ii). Due to the discordance in the wild-type  
624 residue occurring at this site between species, the steric hindrance resulting from the  
625 conversion to leucine cannot be appropriately modeled.  
626 C. Same as in B, but modeling R86H in *B. microti* (corresponding to R74 in the structural  
627 model, colored in green). The *B. microti* Bab05 sample has an R>H mutation at this site;  
628 the mutant residue is shown in gray (ii). Red disks denote significant overlap of atomic  
629 van der Waals radii and thus indicate possible steric hindrance.  
630  
631  
632

633 **Supplementary Figure 12: Contig Alignment of *B. microti*-like strains and Draft**  
 634 **Assemblies**

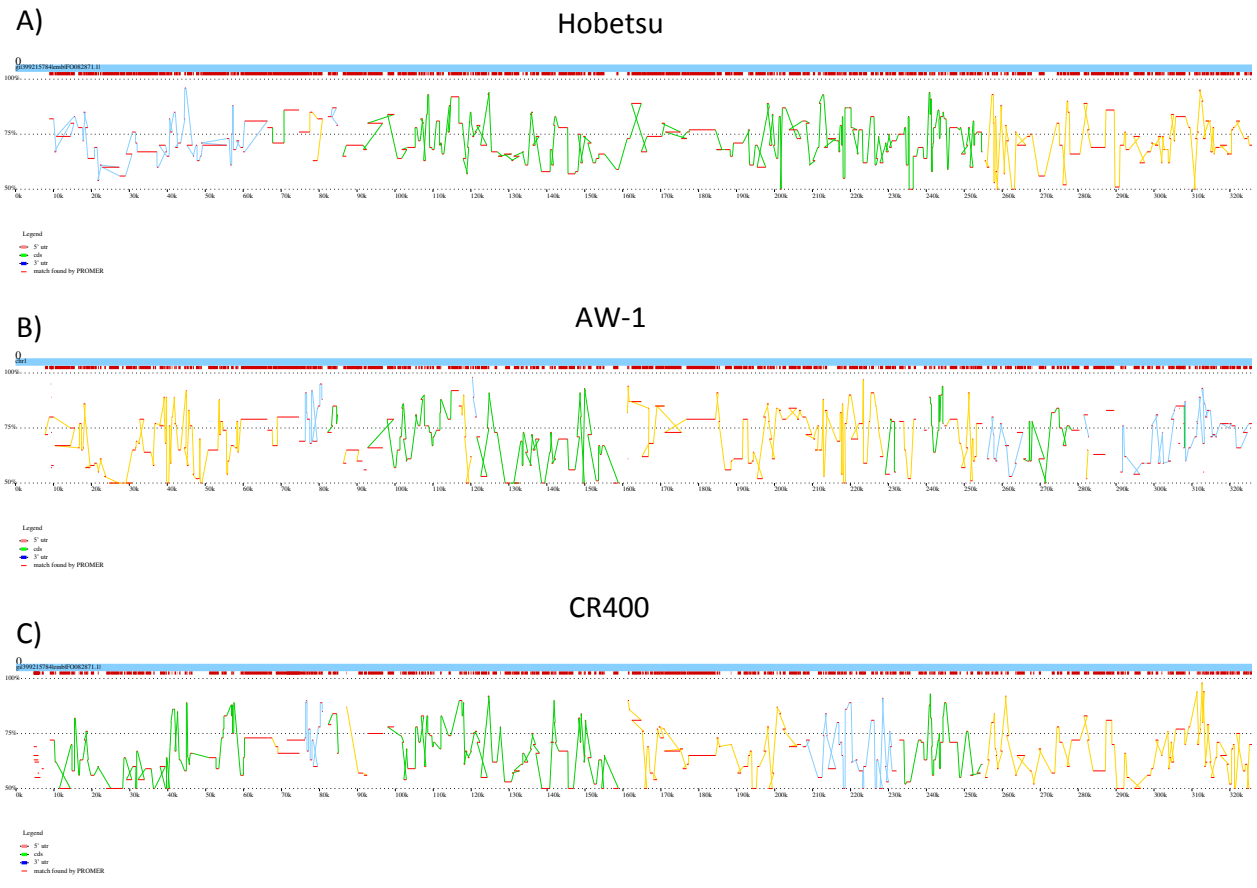

635

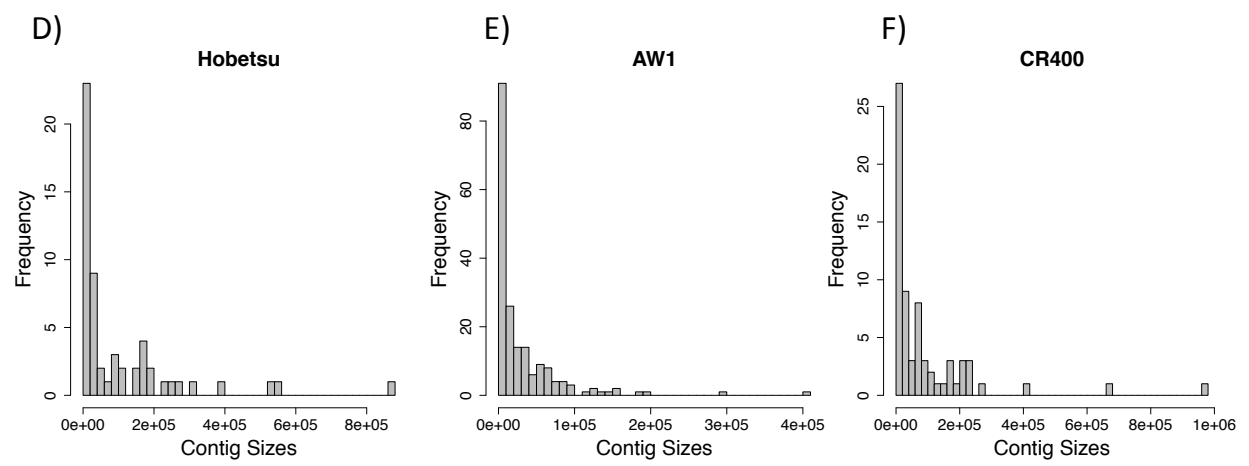

636

637 A-C) Promer alignments for the first 320kb of chromosome 1 for (A) Hobetsu B) AW-1  
 638 samples, both from Japan, and C) CR-400 from Alaska. Distinct contigs are represented  
 639 by different colors, with blue representing the reference sequence and red regions  
 640 representing areas of alignment to the reference. D-F) Distribution of contig sizes for the  
 641 each of the assemblies.

642 **Supplemental Figure 13: Amplification of bmMRP**

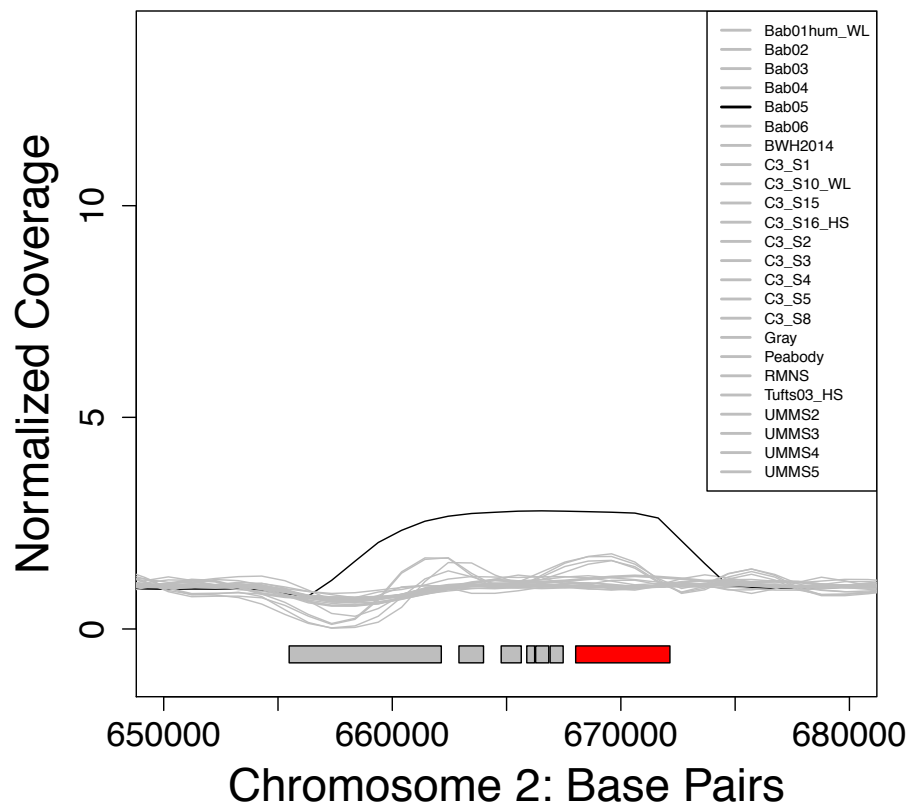

643  
644 Amplification of a 15KB region on chromosome 2 (658,075-672,981), containing bmMRP  
645 (red), which coverage data suggested was present in three copies in Bab05.

646

647  
648  
649  
650  
651  
652  
653  
654  
655  
656  
657  
658  
659  
660  
661  
662  
663  
664  
665  
666  
667  
668  
669  
670  
671  
672  
673  
674  
675  
676  
677  
678  
679  
680  
681  
682  
683  
684  
685  
686  
687  
688  
689  
690  
691  
692  
693  
694  
695  
696

**References:**

1. Western, K. A., Benson, G. D., Gleason, N. N., Healy, G. R. & Schultz, M. G. Babesiosis in a Massachusetts Resident. *N Engl J Med* **283**, 854–856 (1970).
2. Steketee, R. W. *et al.* Babesiosis in Wisconsin: A New Focus of Disease Transmission. *JAMA* **253**, 2675–2678 (1985).
3. Joseph, J. T. *et al.* Babesiosis in Lower Hudson Valley, New York, USA. *Emerg. Infect. Dis.* **17**, 843–847 (2011).
4. Goethert, H. K. & Telford, S. R. What is Babesia microti? *Parasitology* **127**, 301–309 (2003).
5. Tsuji, M. *et al.* Human babesiosis in Japan: epizootiologic survey of rodent reservoir and isolation of new type of Babesia microti-like parasite. *J. Clin. Microbiol.* **39**, 4316–4322 (2001).
6. Wei, Q. *et al.* Human babesiosis in Japan: isolation of Babesia microti-like parasites from an asymptomatic transfusion donor and from a rodent from an area where babesiosis is endemic. *J. Clin. Microbiol.* **39**, 2178–2183 (2001).
7. Nakajima, R. *et al.* Babesia microti-group parasites compared phylogenetically by complete sequencing of the CCTeta gene in 36 isolates. *J Vet Med Sci* **71**, 55–68 (2009).
8. Goethert, H. K., Cook, J. A., Lance, E. W. & Telford, S. R., III. Fay and Rausch 1969 Revisited: Babesia microti in Alaska Small Mammals. *journal of parasitology* **92**, 826–831 (2009).
9. Telford, S. R. *et al.* [Detection of natural foci of babesiosis and granulocytic ehrlichiosis in Russia]. *Zh Mikrobiol Epidemiol Immunobiol* 21–25 (2002).
10. Sriprawat, K. *et al.* Effective and cheap removal of leukocytes and platelets from Plasmodium vivax infected blood. *Malaria Journal* **8**, 115 (2009).
11. Gnirke, A. *et al.* Solution hybrid selection with ultra-long oligonucleotides for massively parallel targeted sequencing. *Nat Biotechnol* **27**, 182–189 (2009).
12. Cornillot, E. *et al.* Sequencing of the smallest Apicomplexan genome from the human pathogen Babesia microti. *Nucleic Acids Research* **40**, 9102–9114 (2012).
13. Not ‘out of Nantucket’: Babesia microti in southern New England comprises at least two major populations. **7**, 546 (2014).
14. Ruebush, T. K. & Spielman, A. Human Babesiosis in the United States. *Ann Intern Med* **88**, 263–263 (1978).
15. Drummond, A. J., Ho, S. Y. W., Phillips, M. J. & Rambaut, A. Relaxed Phylogenetics and Dating with Confidence. *Plos Biol* **4**, e88 (2006).
16. Suchard, M. A., Weiss, R. E. & Sinsheimer, J. S. Bayesian selection of continuous-time Markov chain evolutionary models. *Molecular Biology and Evolution* **18**, 1001–1013 (2001).
17. Baele, G. *et al.* Improving the accuracy of demographic and molecular clock model comparison while accommodating phylogenetic uncertainty. *Molecular Biology and Evolution* **29**, 2157–2167 (2012).
18. Telford, S. R., III. Babesial infections in humans and wildlife. *Parasitic protozoa* **5**, 1–47 (1993).
19. Rudzinska, M. A., Spielman, A., Lewengrub, S., Trager, W. & Piesman, J. Sexuality in piroplasms as revealed by electron microscopy in Babesia microti. *Proceedings of the National Academy of Sciences* **80**, 2966–2970 (1983).
20. Bruen, T. C., Philippe, H. & Bryant, D. A Simple and Robust Statistical Test for Detecting the Presence of Recombination. *Genetics* **172**, 2665–2681 (2006).



- 697 21. Homer, M. J. *et al.* A Polymorphic Multigene Family Encoding an  
698 Immunodominant Protein from *Babesia microti*. *J. Clin. Microbiol.* **38**, 362–368  
699 (2000).
- 700 22. Deitsch, K. W., Moxon, E. R. & Wellems, T. E. Shared themes of antigenic  
701 variation and virulence in bacterial, protozoal, and fungal infections. *Microbiol.*  
702 *Mol. Biol. Rev.* **61**, 281–293 (1997).
- 703 23. Barry, J. D., Ginger, M. L., Burton, P. & McCulloch, R. Why are parasite  
704 contingency genes often associated with telomeres? *International Journal for*  
705 *Parasitology* **33**, 29–45 (2003).
- 706 24. Jackson, A. P. Genome evolution in trypanosomatid parasites. *Parasitology* **142**  
707 **Suppl 1**, S40–56 (2015).
- 708 25. Zarowiecki, M. & Berriman, M. What helminth genomes have taught us about  
709 parasite evolution. *Parasitology* **142 Suppl 1**, S85–97 (2015).
- 710 26. Reid, A. J. Large, rapidly evolving gene families are at the forefront of host–  
711 parasite interactions in Apicomplexa. *Parasitology* **142**, S57–S70 (2014).
- 712 27. Reid, A. J. Large, rapidly evolving gene families are at the forefront of host–  
713 parasite interactions in Apicomplexa. *Parasitology* **142**, S57–S70 (2014).
- 714 28. Kyes, S., Horrocks, P. & Newbold, C. Antigenic Variation at the Infected Red Cell  
715 Surface in Malaria. *Annu. Rev. Microbiol.* **55**, 673–707 (2001).
- 716 29. Allred, D. R. & Al-Khedery, B. Antigenic variation and cytoadhesion in *Babesia*  
717 *bovis* and *Plasmodium falciparum*: different logics achieve the same goal. *Mol.*  
718 *Biochem. Parasitol.* **134**, 27–35 (2004).
- 719 30. Allred, D. R., Cinque, R. M., Lane, T. J. & Ahrens, K. P. Antigenic variation of  
720 parasite-derived antigens on the surface of *Babesia bovis*-infected erythrocytes.  
721 *Infect. Immun.* **62**, 91–98 (1994).
- 722 31. Al-Khedery, B. & Allred, D. R. Antigenic variation in *Babesia bovis* occurs through  
723 segmental gene conversion of the var multigene family, within a bidirectional  
724 locus of active transcription. *Mol. Microbiol.* **59**, 402–414 (2006).
- 725 32. Frank, M. *et al.* Frequent recombination events generate diversity within the multi-  
726 copy variant antigen gene families of *Plasmodium falciparum*. *International*  
727 *Journal for Parasitology* **38**, 1099–1109 (2008).
- 728 33. Claessens, A. *et al.* Generation of Antigenic Diversity in *Plasmodium falciparum*  
729 by Structured Rearrangement of Var Genes During Mitosis. *PLoS Genet* **10**,  
730 e1004812 (2014).
- 731 34. Borst, P. & Cross, G. A. M. Molecular basis for trypanosome antigenic variation.  
732 *Cell* **29**, 291–303 (1982).
- 733 35. Vyas, J. M., Telford, S. R. & Robbins, G. K. Treatment of refractory *Babesia*  
734 *microti* infection with atovaquone-proguanil in an HIV-infected patient: case report.  
735 *Clin Infect Dis.* **45**, 1588–1590 (2007).
- 736 36. Ruebush, M. J. & Hanson, W. L. Susceptibility of Five Strains of Mice to *Babesia*  
737 *microti* of Human Origin. *The Journal of Parasitology* **65**, 430 (1979).
- 738 37. Price, R. N. *et al.* Mefloquine resistance in *Plasmodium falciparum* and increased  
739 pfmdr1 gene copy number. *The Lancet* **364**, 438–447 (2004).
- 740 38. Venkatesan, M. *et al.* Polymorphisms in *Plasmodium falciparum* chloroquine  
741 resistance transporter and multidrug resistance 1 genes: parasite risk factors that  
742 affect treatment outcomes for *P. falciparum* malaria after artemether-lumefantrine  
743 and artesunate-amodiaquine. *Am. J. Trop. Med. Hyg.* **91**, 833–843 (2014).
- 744 39. Raj, D. K. *et al.* Disruption of a *Plasmodium falciparum* multidrug resistance-  
745 associated protein (PfMRP) alters its fitness and transport of antimalarial drugs  
746 and glutathione. *Journal of Biological Chemistry* **284**, 7687–7696 (2009).
- 747 40. Piesman, J., Karakashian, S. J., Lewengrub, S., Rudzinska, M. A. & Spielman,

- 748 A. Development of Babesia microti sporozoites in adult Ixodes dammini.  
749 *International Journal for Parasitology* **16**, 381–385 (1986).
- 750 41. Sakuma, M., Setoguchi, A. & Endo, Y. Possible Emergence of Drug-Resistant  
751 Variants of Babesia gibsoni in Clinical Cases Treated with Atovaquone and  
752 Azithromycin. *Journal of Veterinary Internal Medicine* **23**, 493–498 (2009).
- 753 42. Matsuu, A., Miyamoto, K., Ikadai, H., Okano, S. & Higuchi, S. Short report: cloning  
754 of the Babesia gibsoni cytochrome B gene and isolation of three single nucleotide  
755 polymorphisms from parasites present after atovaquone treatment. *American*  
756 *Journal of Tropical Medicine and Hygiene* **74**, 593–597 (2006).
- 757 43. McFadden, D. C., Tomavo, S., Berry, E. A. & Boothroyd, J. C. Characterization of  
758 cytochrome b from Toxoplasma gondii and Qo domain mutations as a mechanism  
759 of atovaquone-resistance. *Mol. Biochem. Parasitol.* **108**, 1–12 (2000).
- 760 44. Korsinczky, M. *et al.* Mutations in Plasmodium falciparum cytochrome b that are  
761 associated with atovaquone resistance are located at a putative drug-binding site.  
762 *Antimicrob. Agents Chemother.* **44**, 2100–2108 (2000).
- 763 45. Sidhu, A. B. S. *et al.* In vitro efficacy, resistance selection, and structural modeling  
764 studies implicate the malarial parasite apicoplast as the target of azithromycin.  
765 *Journal of Biological Chemistry* **282**, 2494–2504 (2007).
- 766 46. Chittum, H. S. & Champney, W. S. Erythromycin inhibits the assembly of the large  
767 ribosomal subunit in growing Escherichia coli cells. *Current Microbiology* **30**, 273–  
768 279 (1995).
- 769 47. Benjamini, Y. & Hochberg, Y. Controlling the False Discovery Rate: A Practical  
770 and Powerful Approach to Multiple Testing. *Journal of the Royal Statistical*  
771 *Society. Series B (Methodological)* **57**, 289–300 (1995).
- 772 48. Birth, D., Kao, W.-C. & Hunte, C. Structural analysis of atovaquone-inhibited  
773 cytochrome bc1 complex reveals the molecular basis of antimalarial drug action.  
774 *Nature Communications* **5**, (2014).
- 775 49. Bulkley, D., Innis, C. A., Blaha, G. & Steitz, T. A. Revisiting the structures of  
776 several antibiotics bound to the bacterial ribosome. *Proceedings of the National*  
777 *Academy of Sciences* **107**, 17158–17163 (2010).
- 778 50. Pihlajamäki, M. *et al.* Ribosomal mutations in Streptococcus pneumoniae clinical  
779 isolates. *Antimicrob. Agents Chemother.* **46**, 654–658 (2002).
- 780
